# Supplementary material for: The summer 2019 basaltic Vulcanian eruptions (paroxysms) of Stromboli
Source: Springer Nature journal article supplement (doi:10.1007/s00445-020-01423-2), 2020-12-03
Supplement: 445_2020_1423_MOESM1_ESM.pdf [file 445_2020_1423_MOESM1_ESM.pdf]

Supplementary Material S1 –  
Photographic record of the summer 2019  
eruptive activity of Stromboli and related  
deposits

*G. Giordano, Università Roma Tre*

*G. De Astis, INGV Roma*

Fig. S1a; 20-23 JUNE 2019

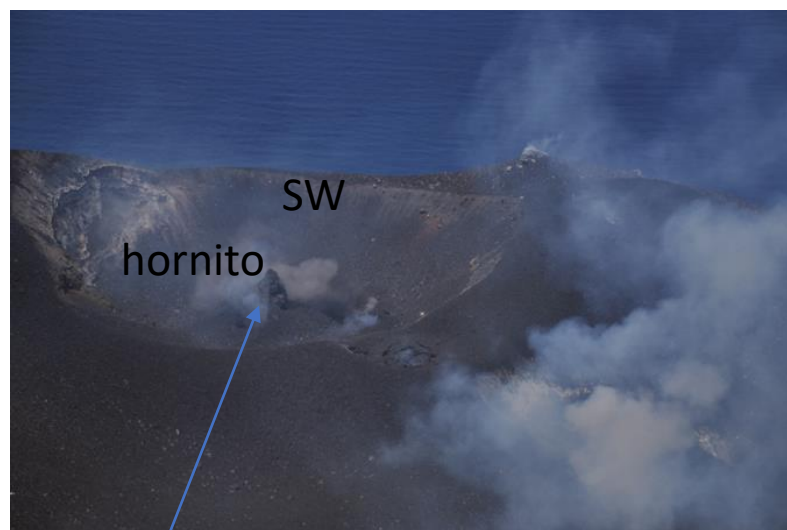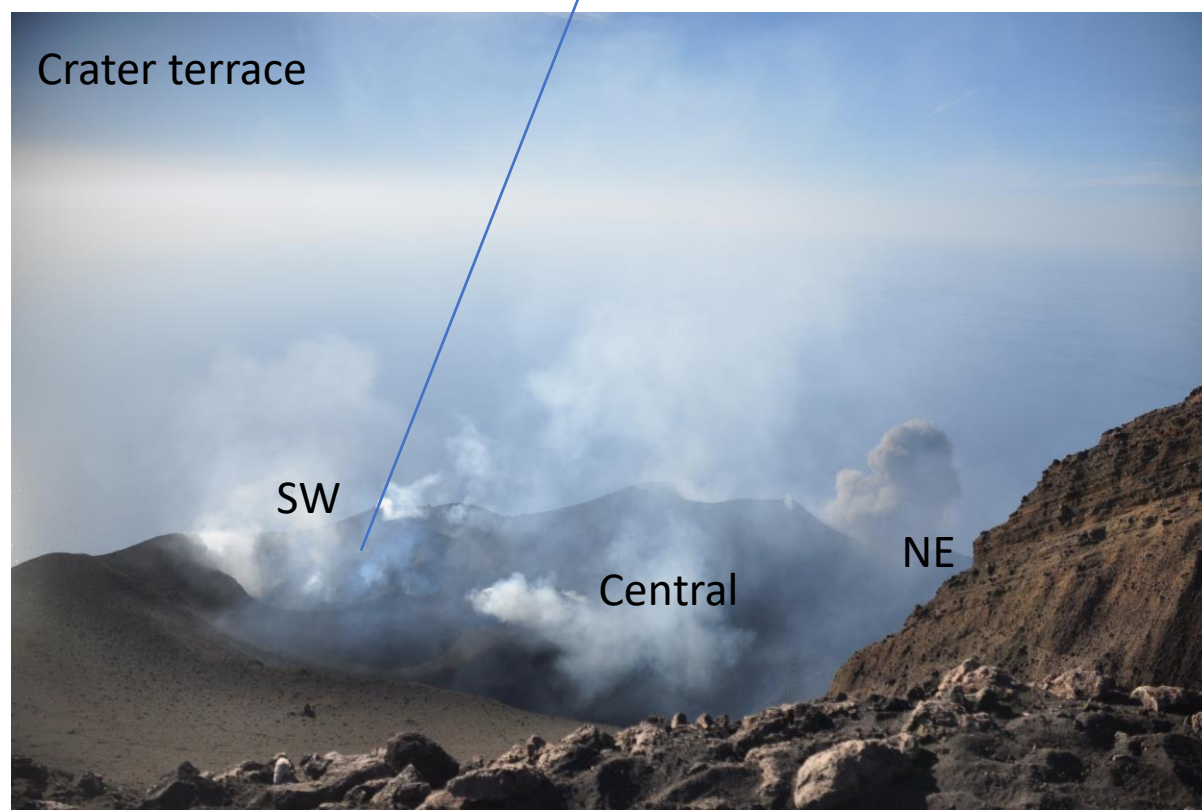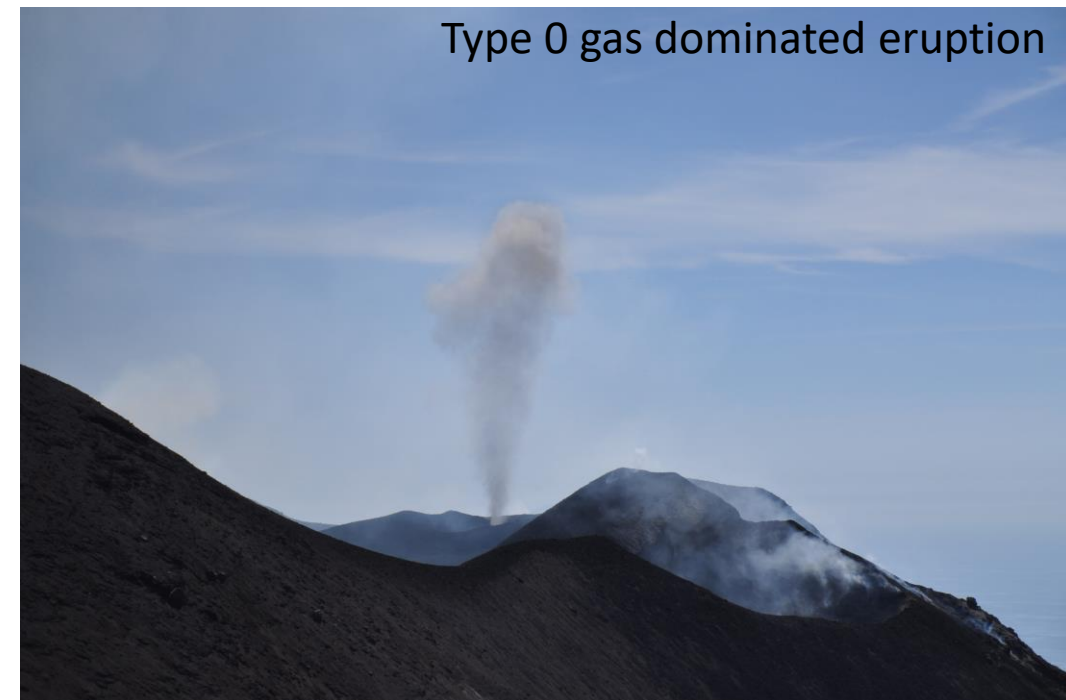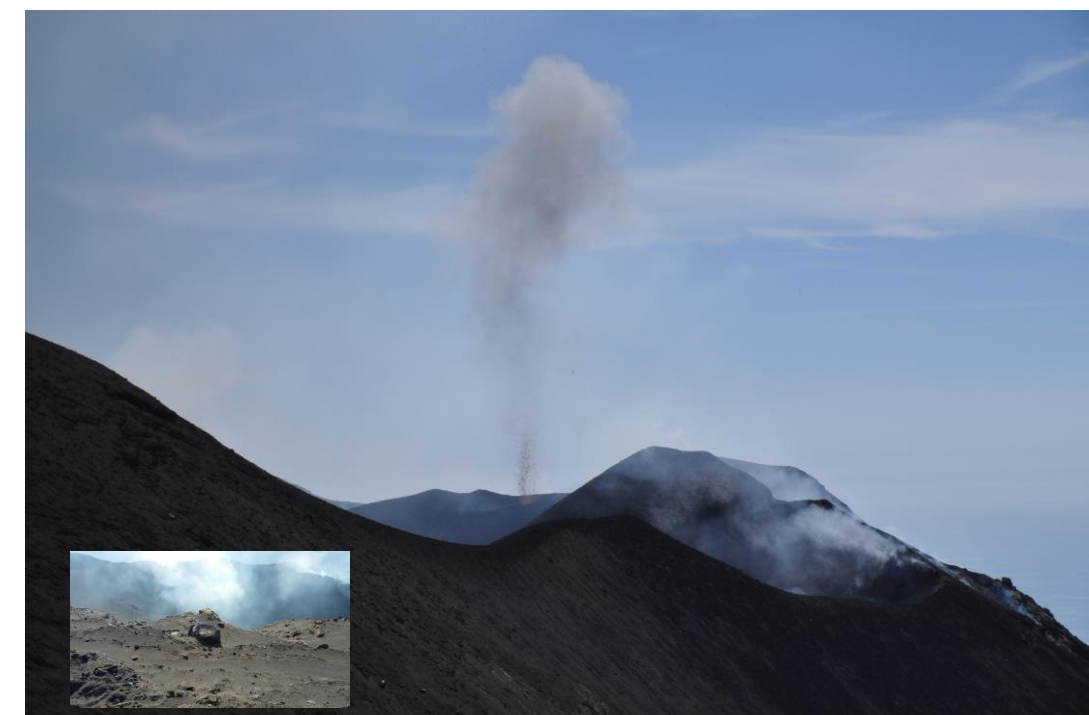



**Fig. S1b; 25 JUNE 2019 – MAJOR EXPLOSION, 23:03 UTC**

Isopleths (dashed yellow lines) of spatter bombs and lava blocks of the June 25 Major explosion. the dotted black arrows indicate the rolling stone paths, which set fire to the bush below

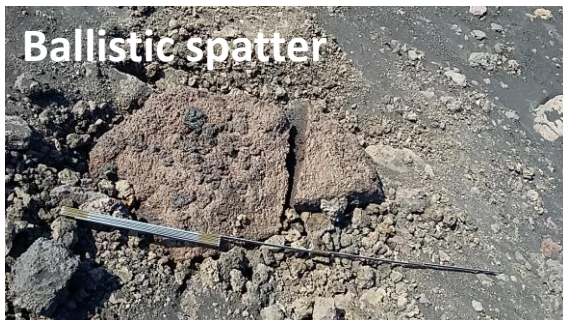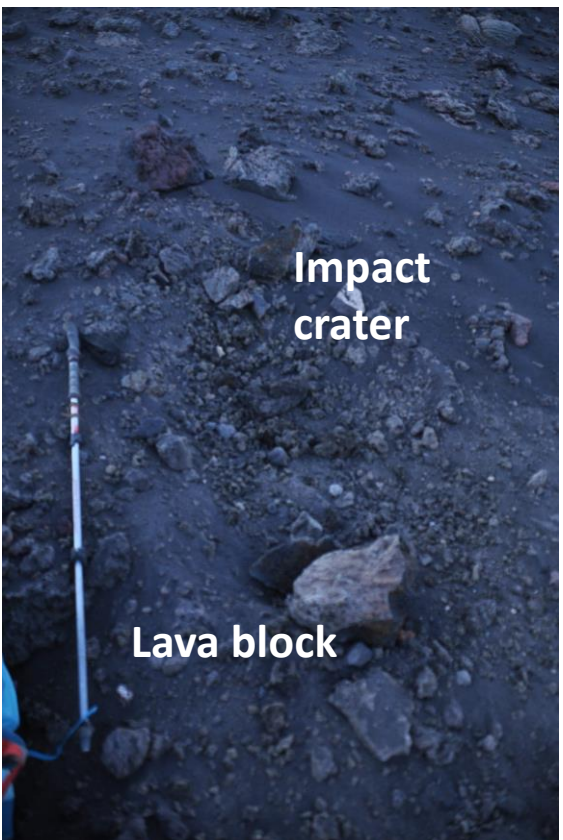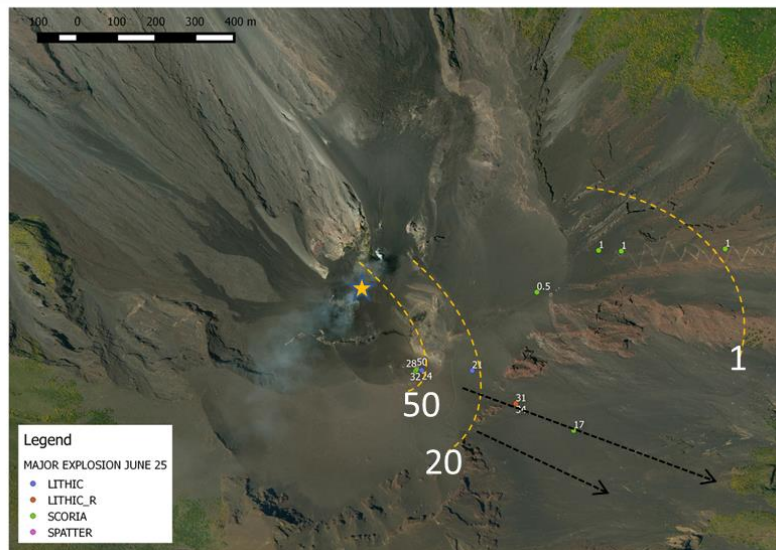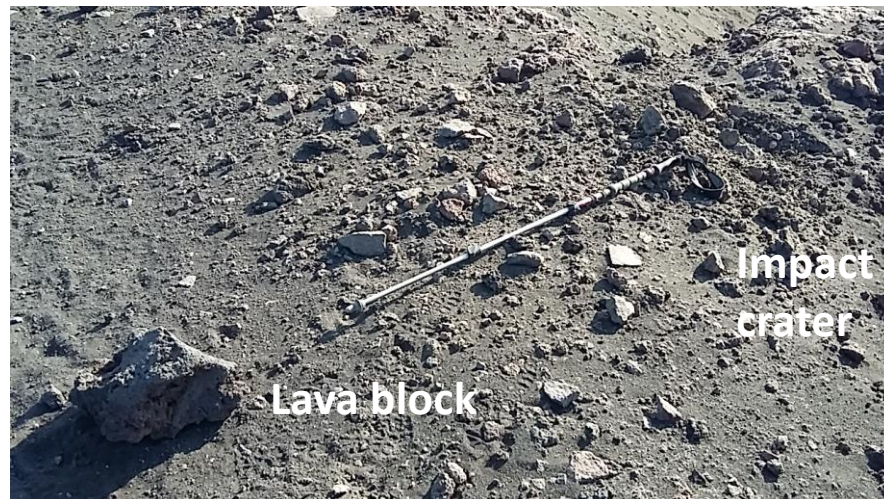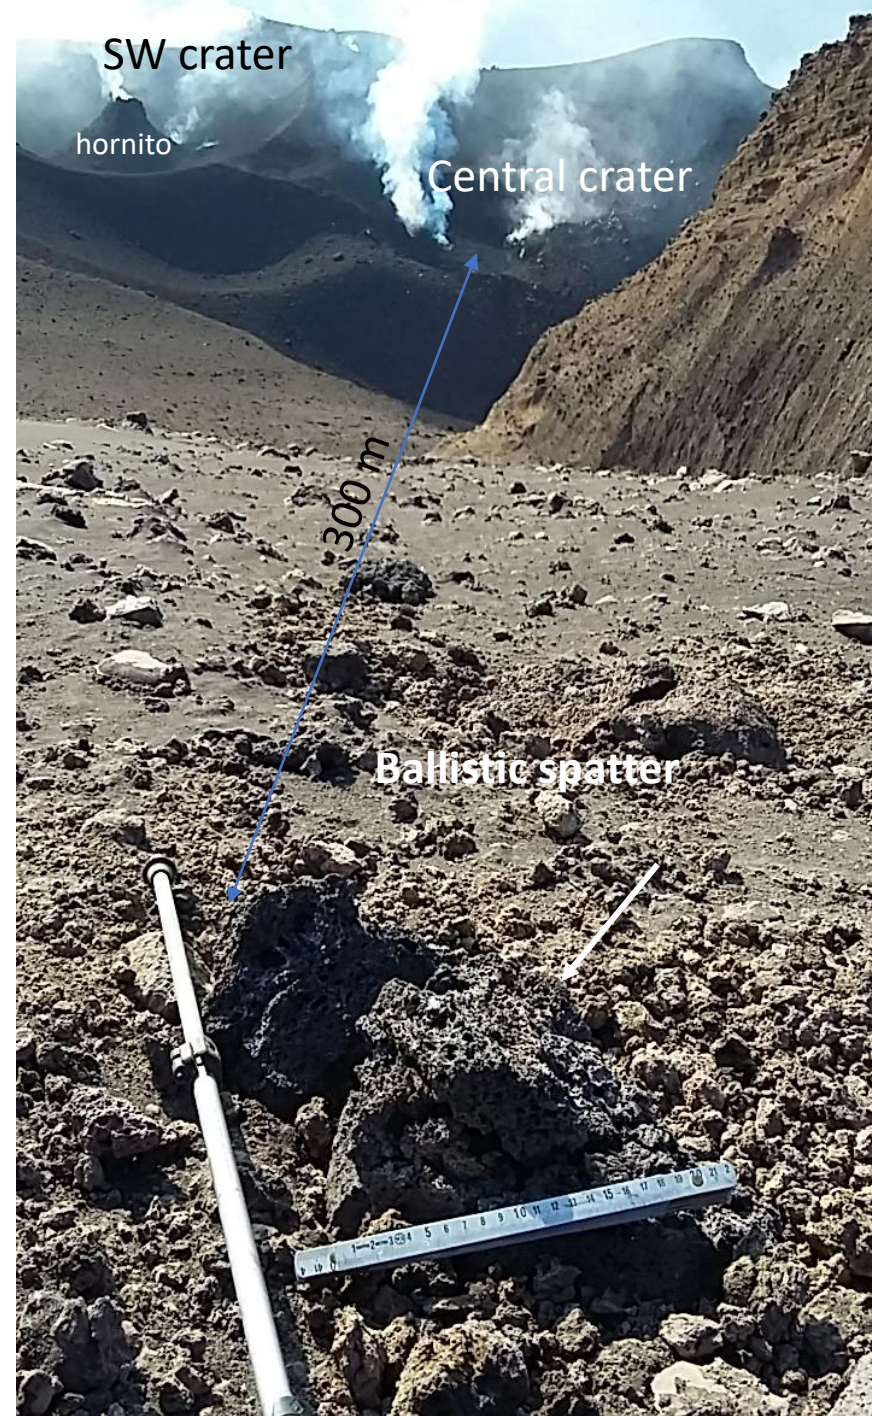



**Fig. S1c; 25 JUNE 2019 – MAJOR EXPLOSION, 23:03 UTC**

The Central crater rim littered by large lithic blocks and crater floor levelled out and covered by large coalescing spatter clasts after the Major Explosion of June 25. At the center of the crater floor two open vents were continuously puffing and spattering from gas bubbles bursting at the surface.

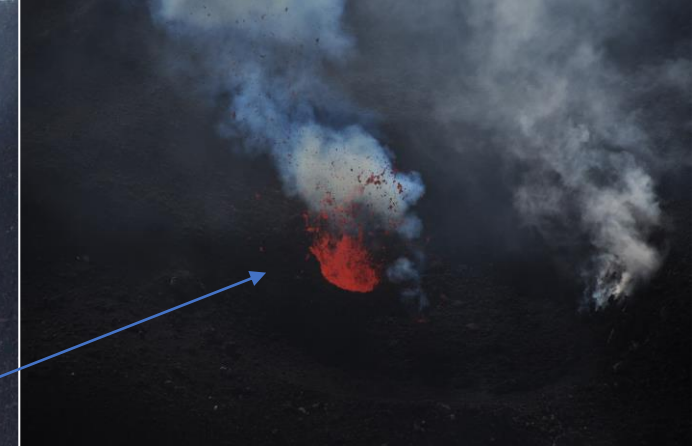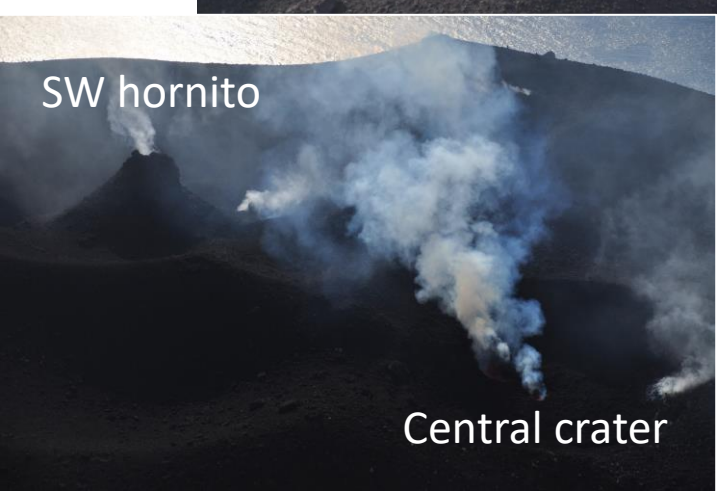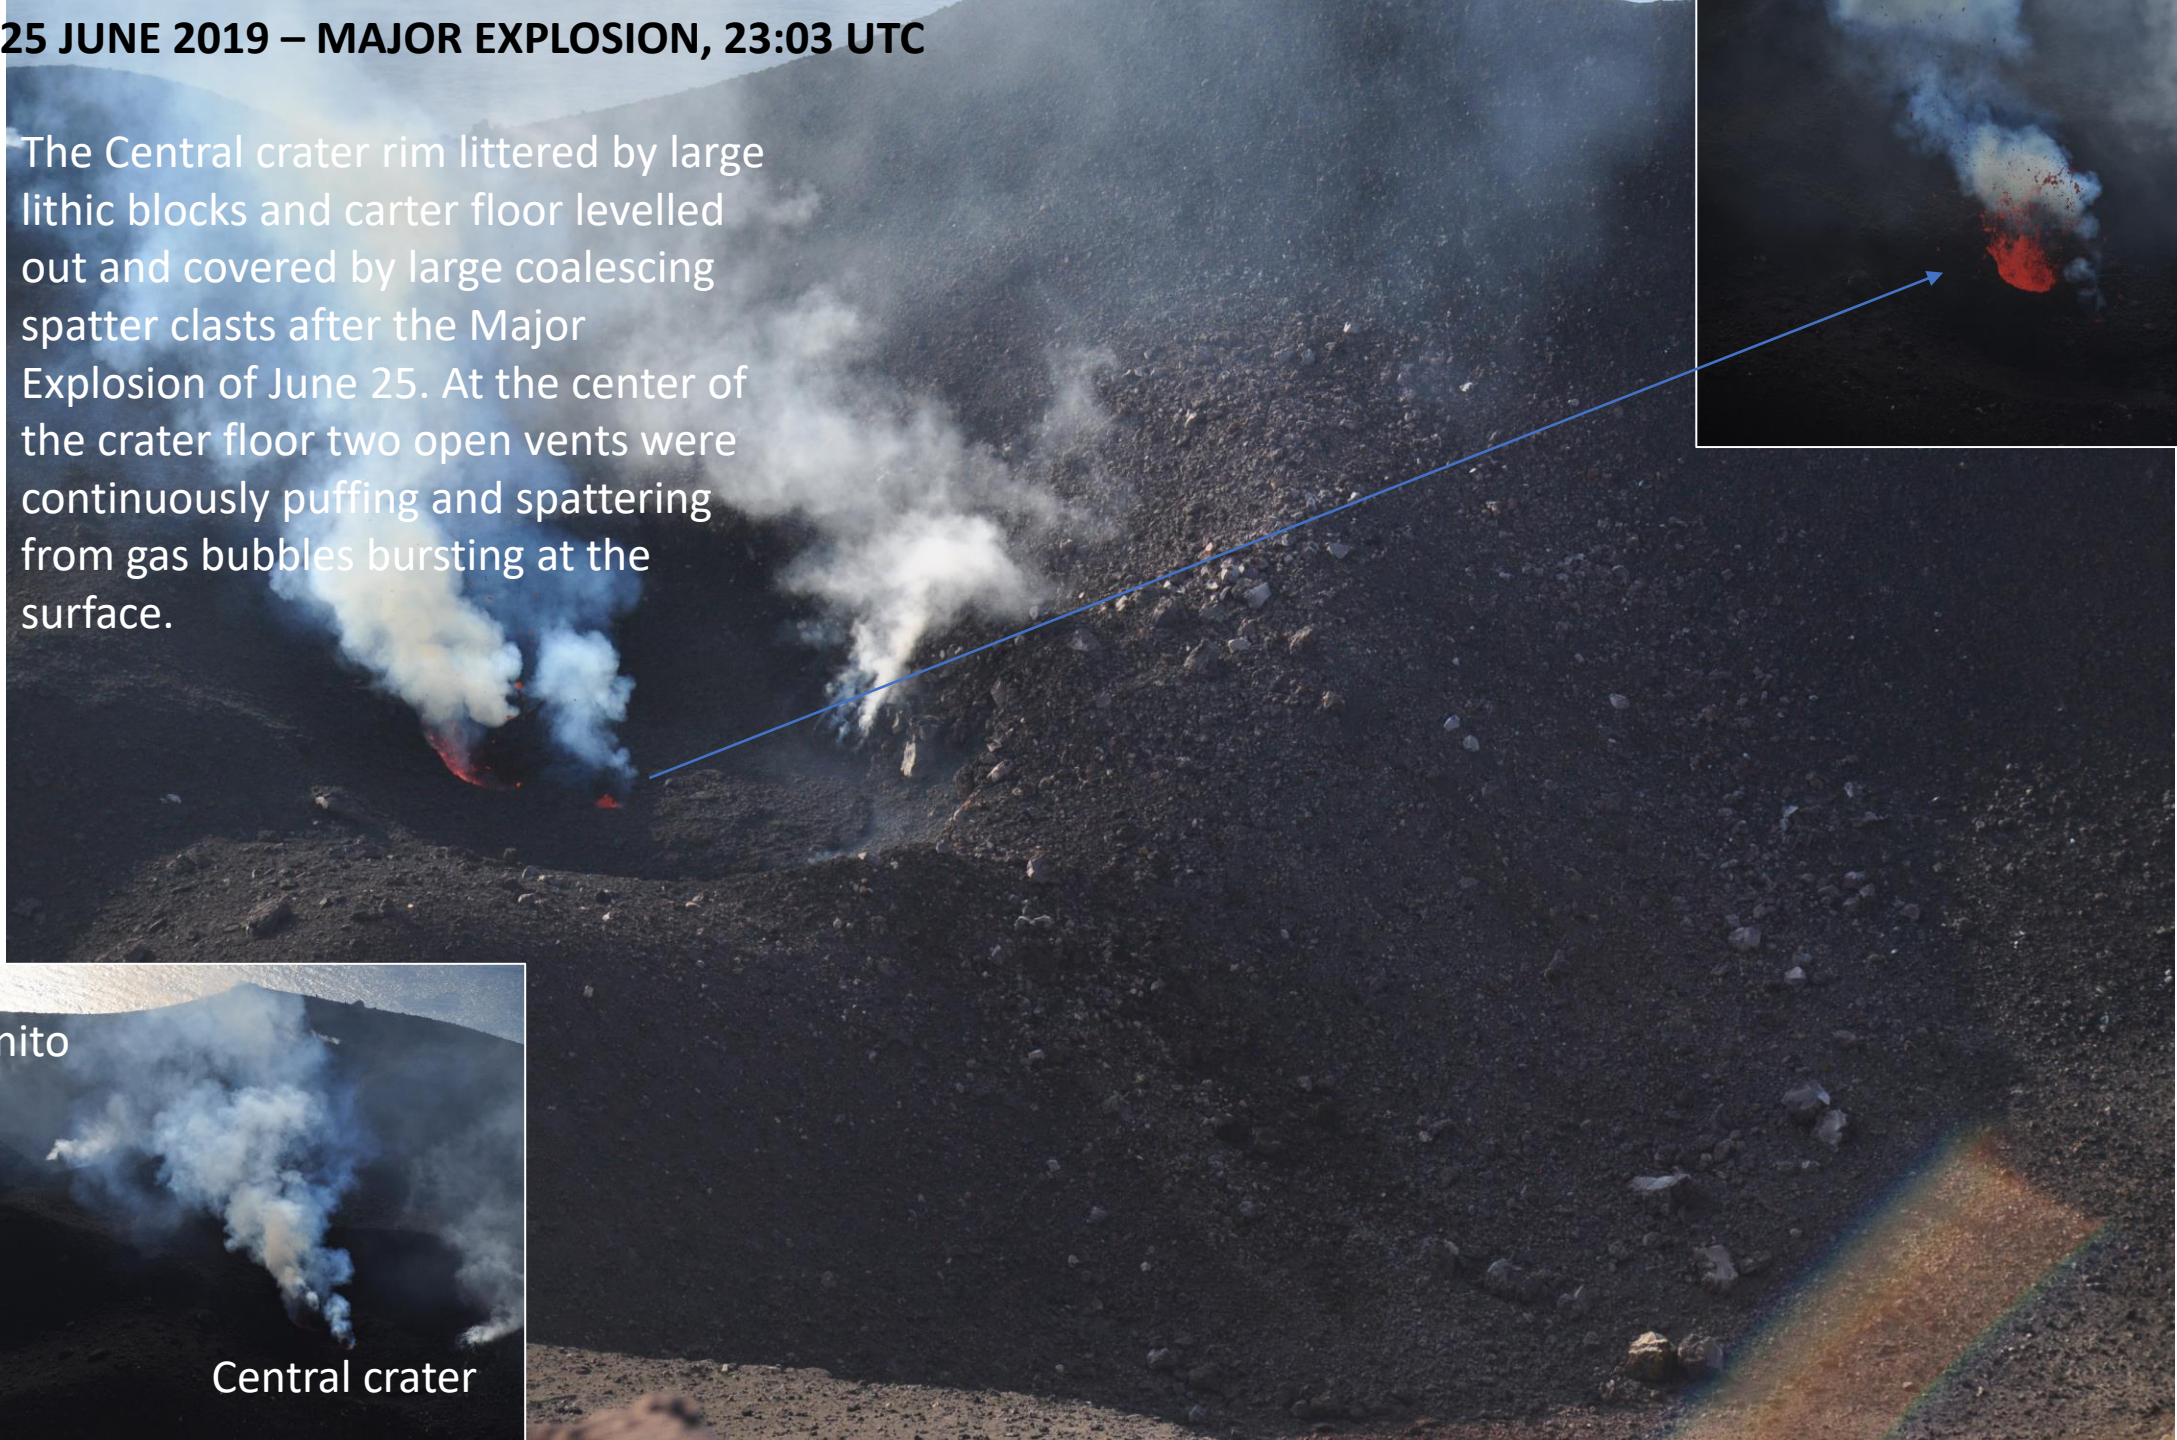



Fig. S1d; 2 JULY 2019

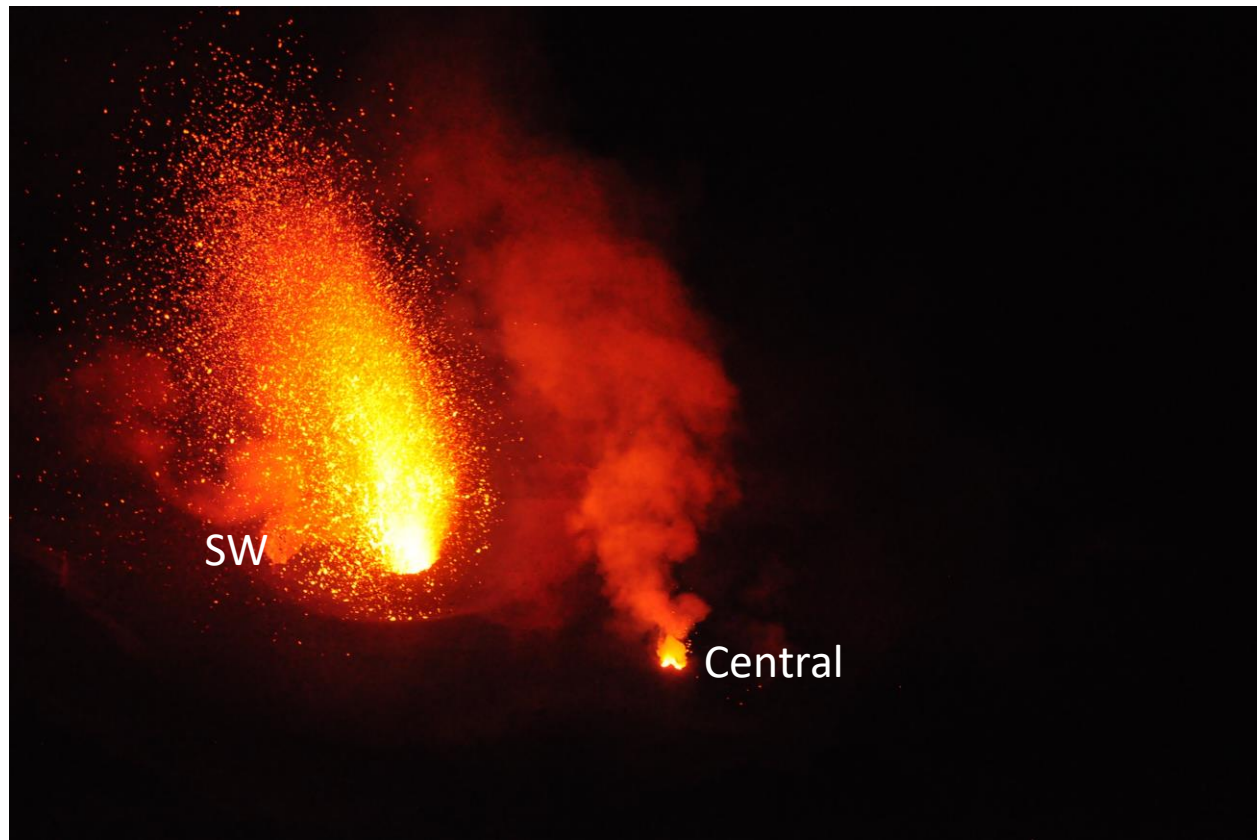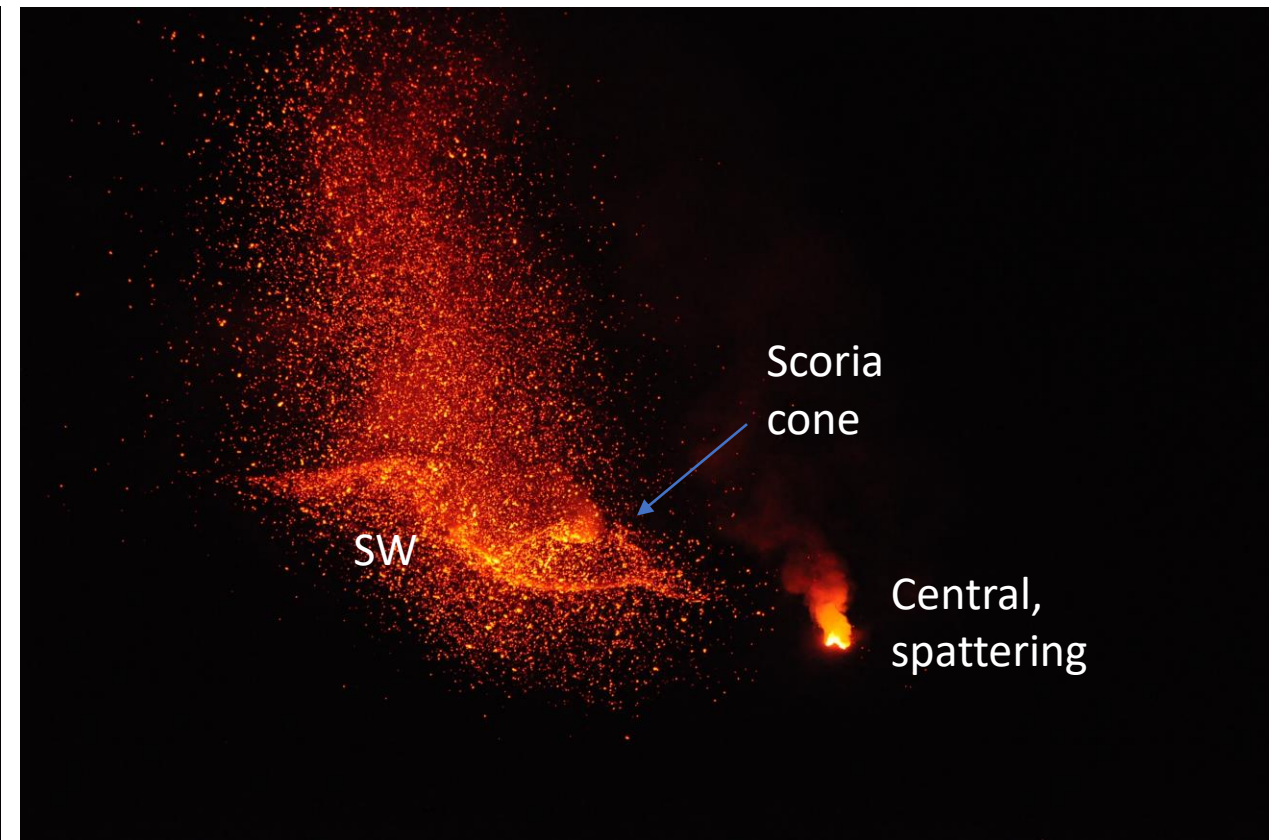

Intense and frequent Type 1 strombolian fountains from the SW crater and continuous spattering from the Central crater characterised the night before the paroxysm

Fig. S1e; 3 JULY 2019 – 14:45 UTC

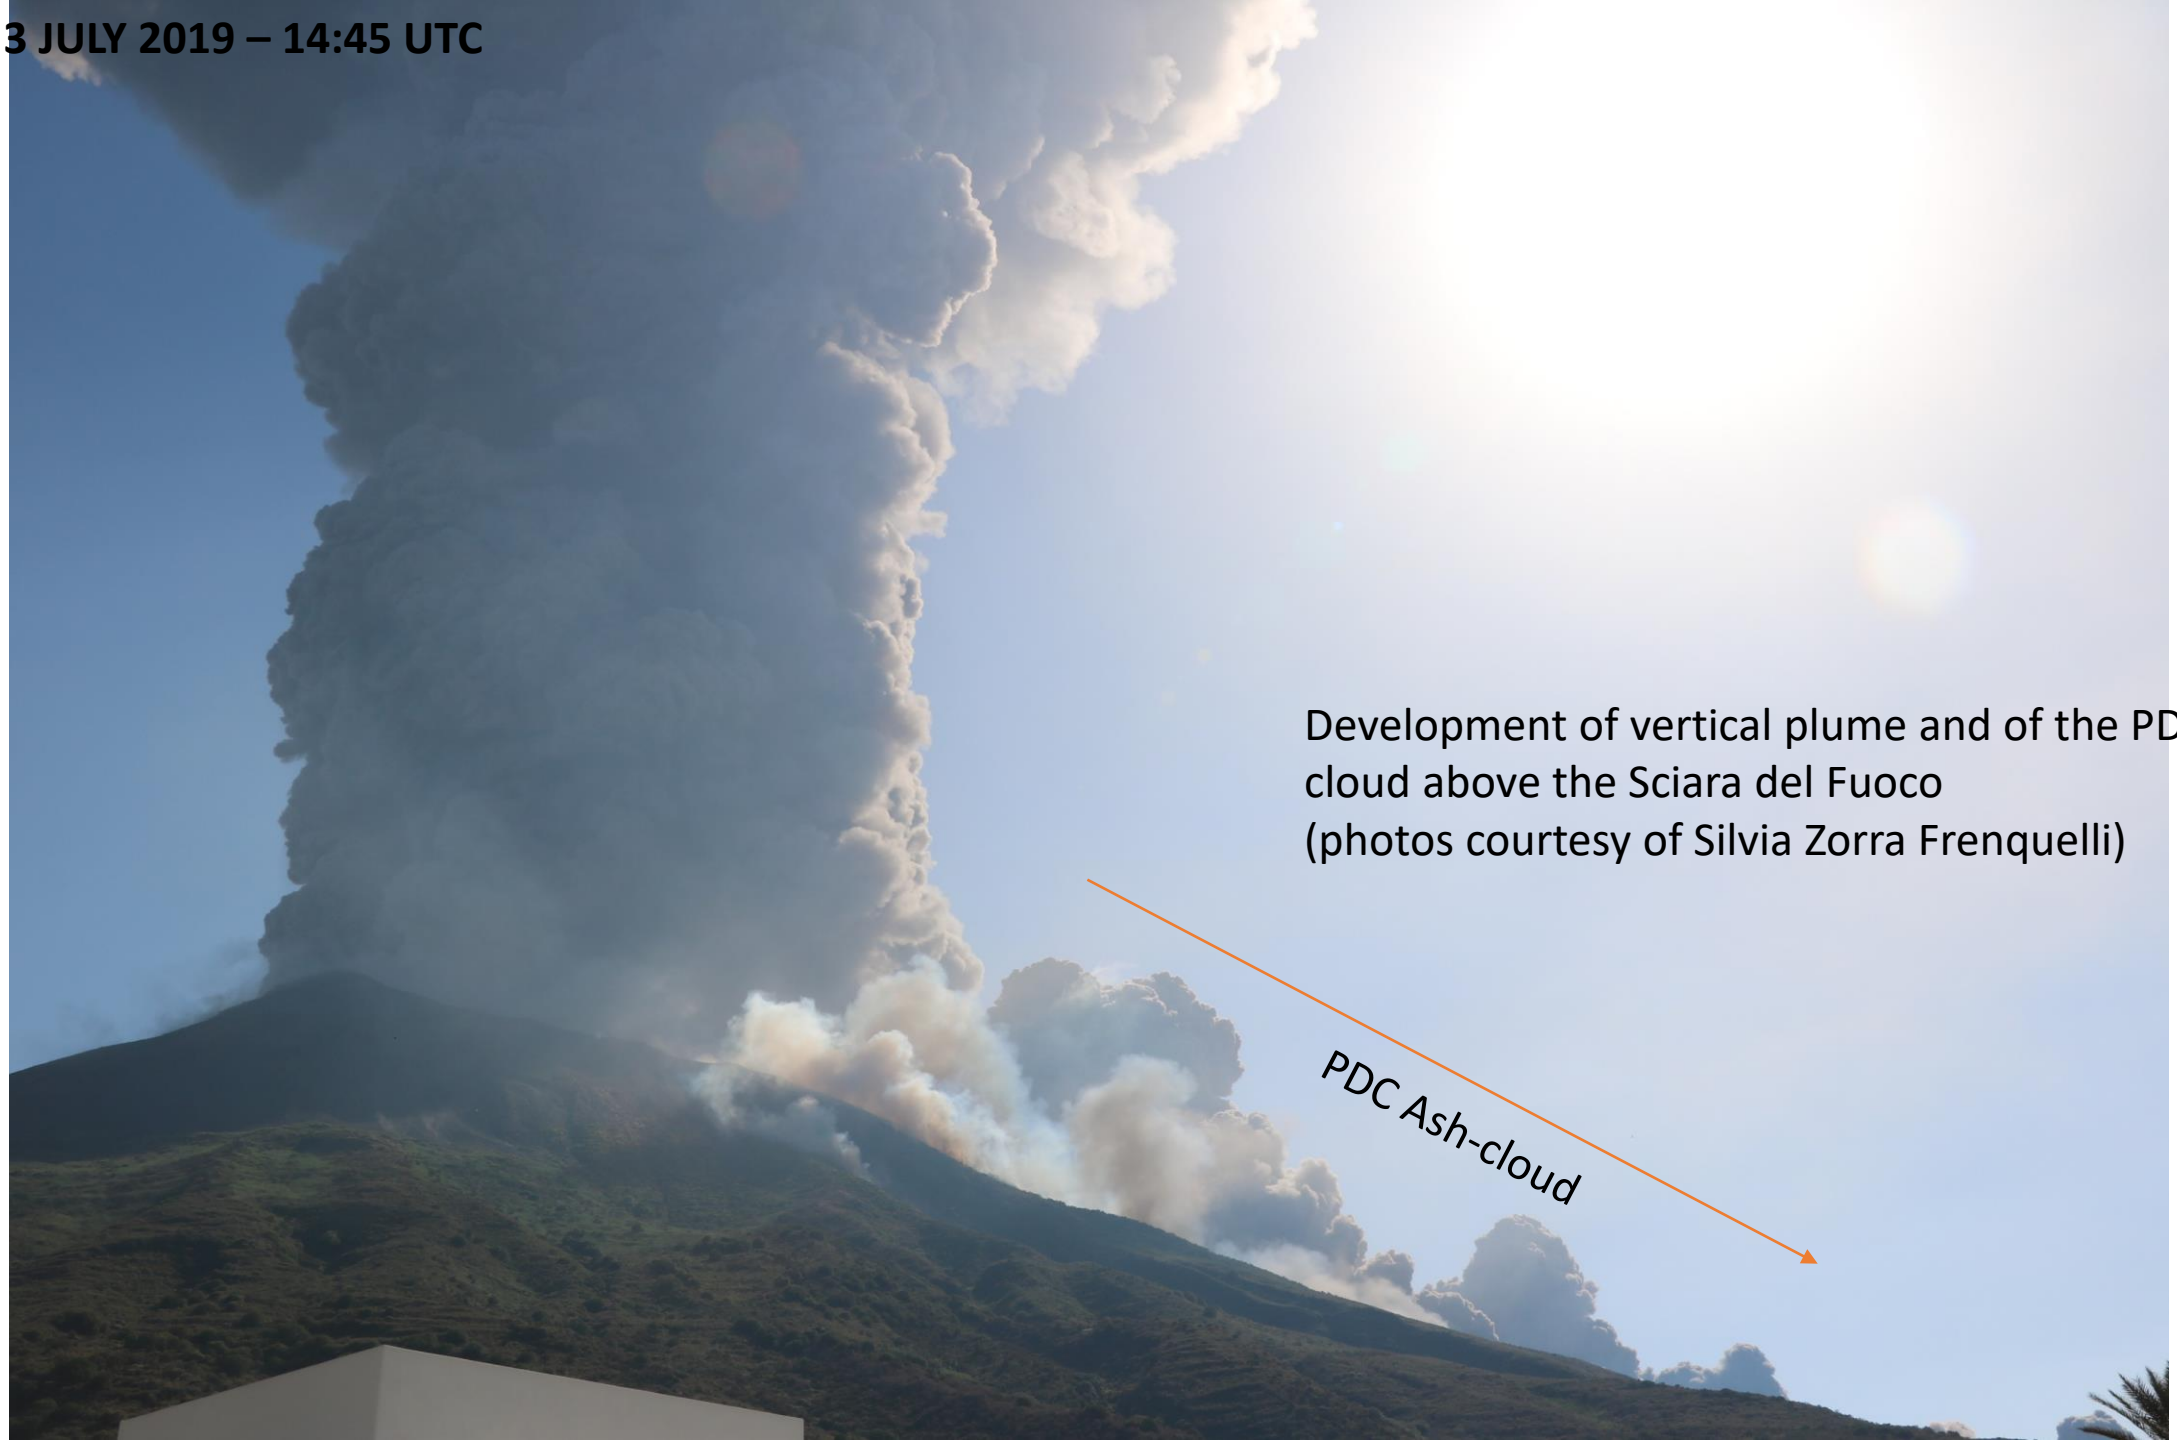

Development of vertical plume and of the PDC ash-cloud above the Sciara del Fuoco  
(photos courtesy of Silvia Zorra Frenquelli)

PDC Ash-cloud

Fig. S1e; 3 JULY 2019 – 14:45 UTC

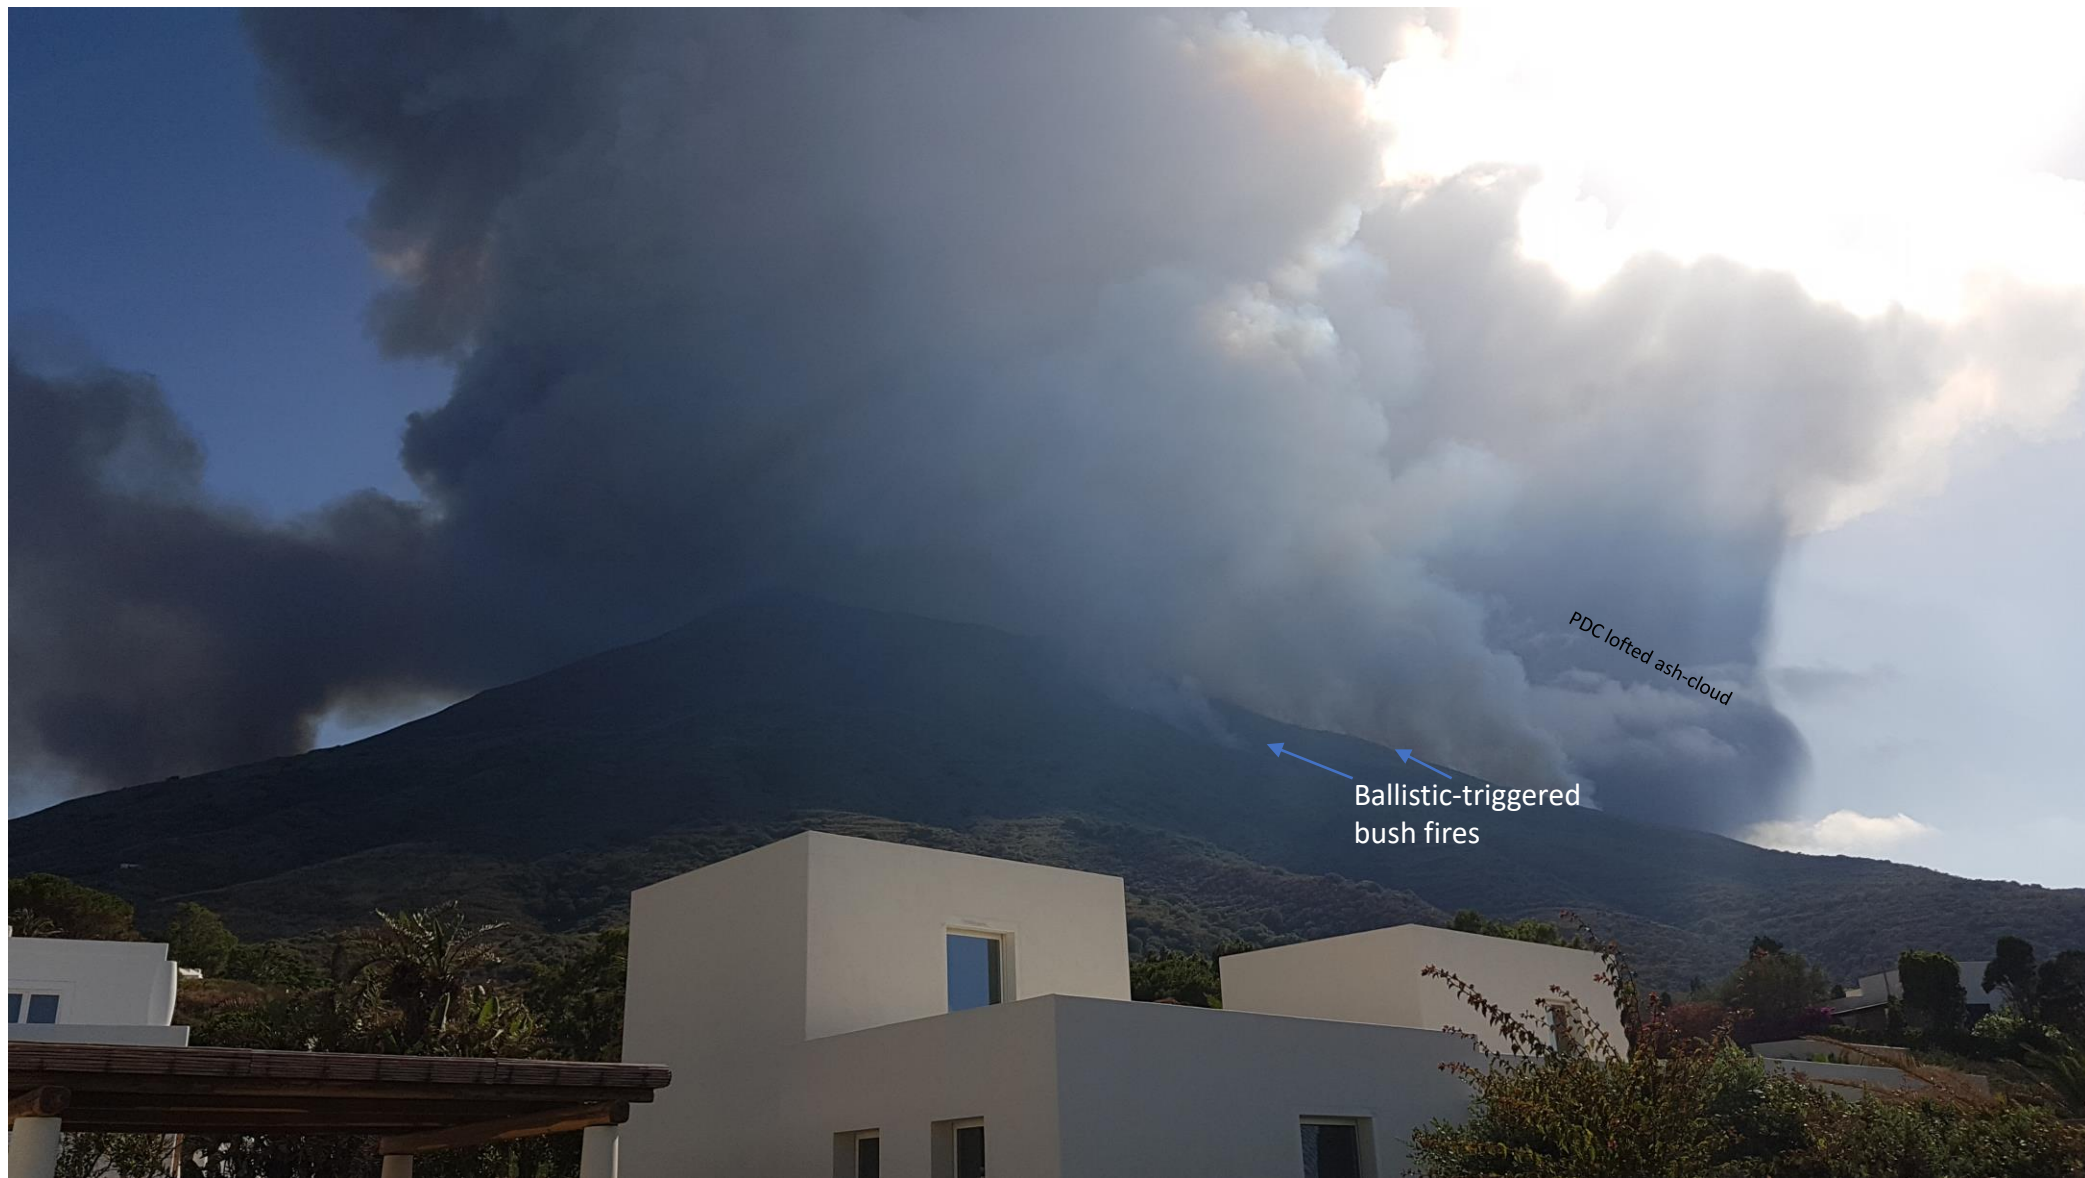



Fig. S1g; 3 JULY

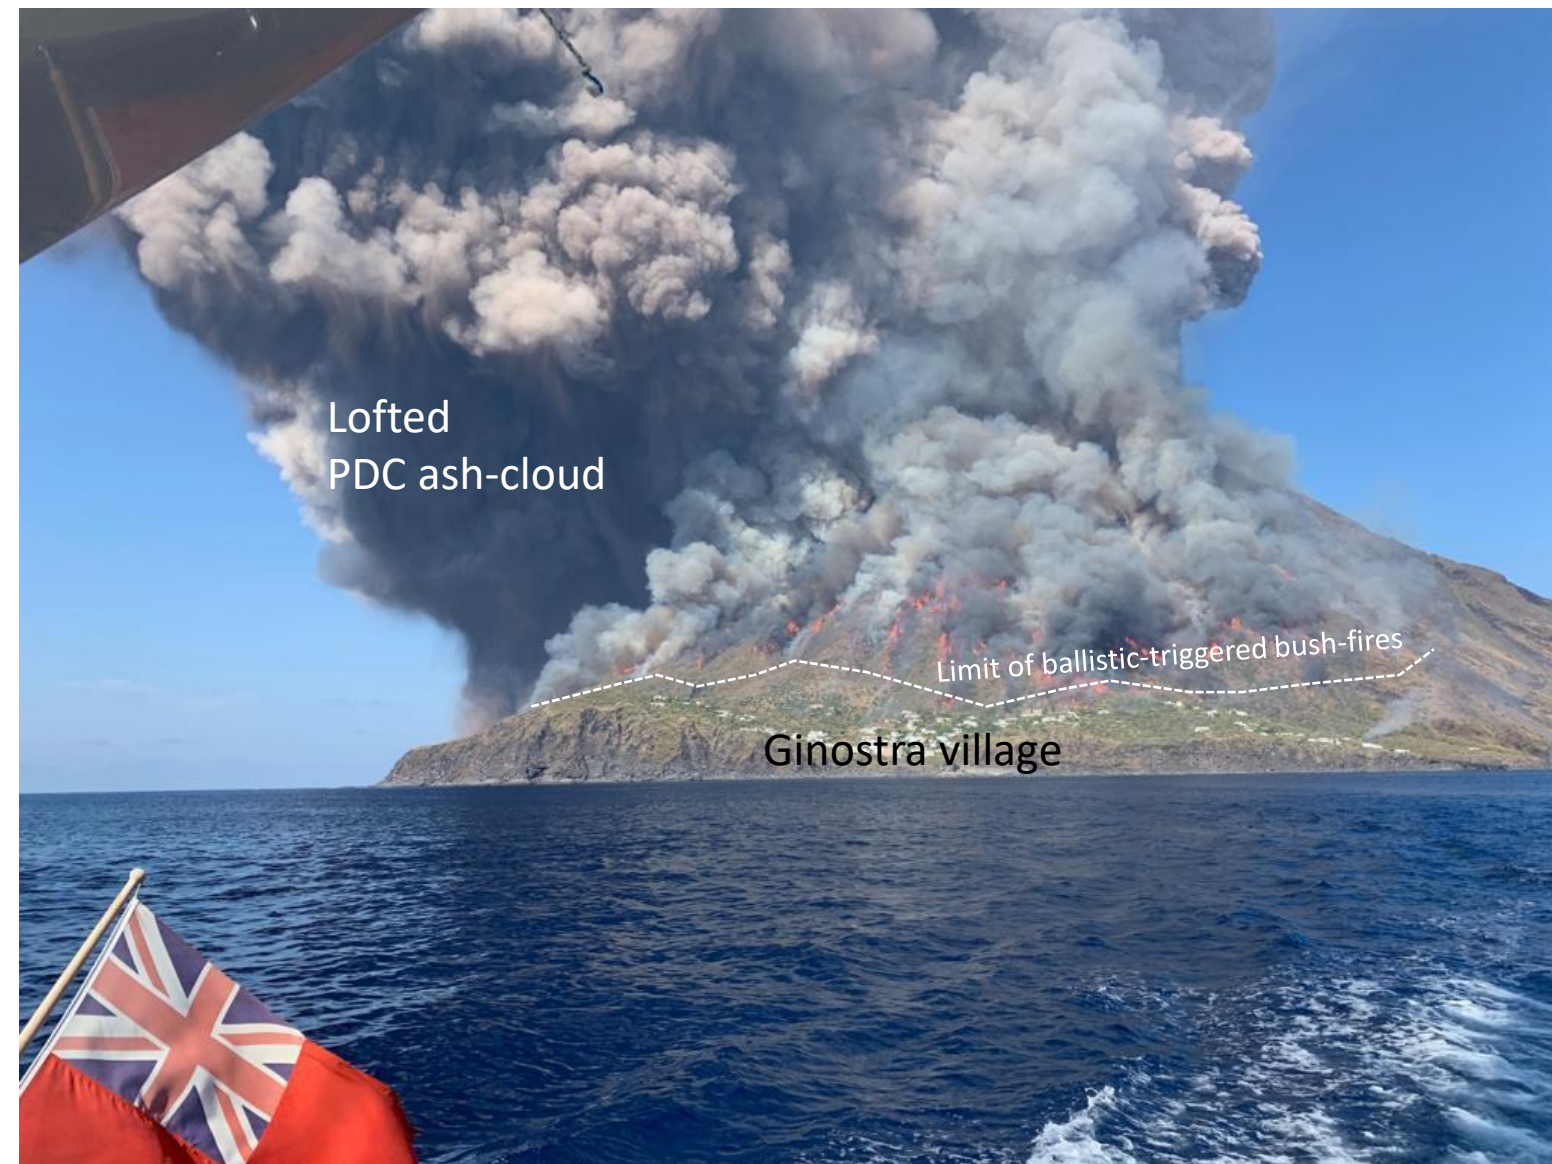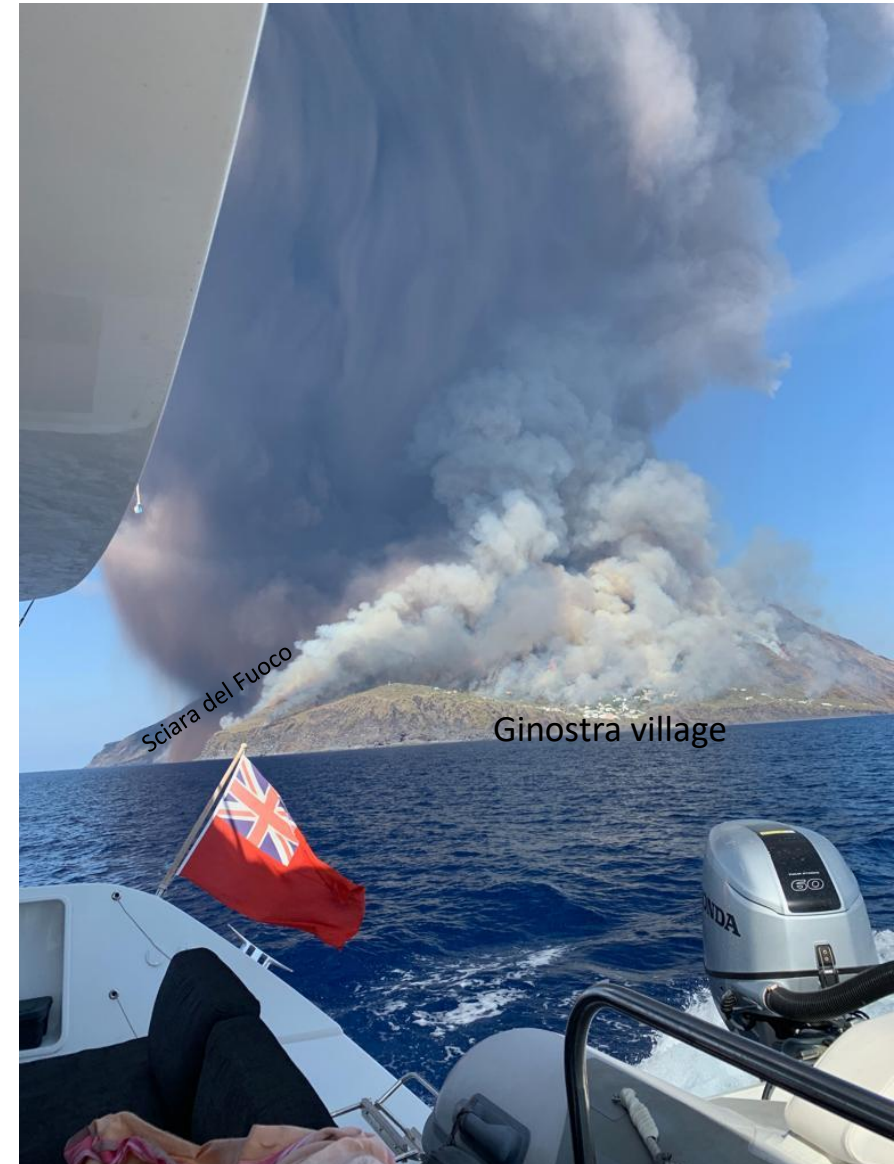

Photo courtesy of Saloua Rinauro



Fig. S1h; 3 JULY

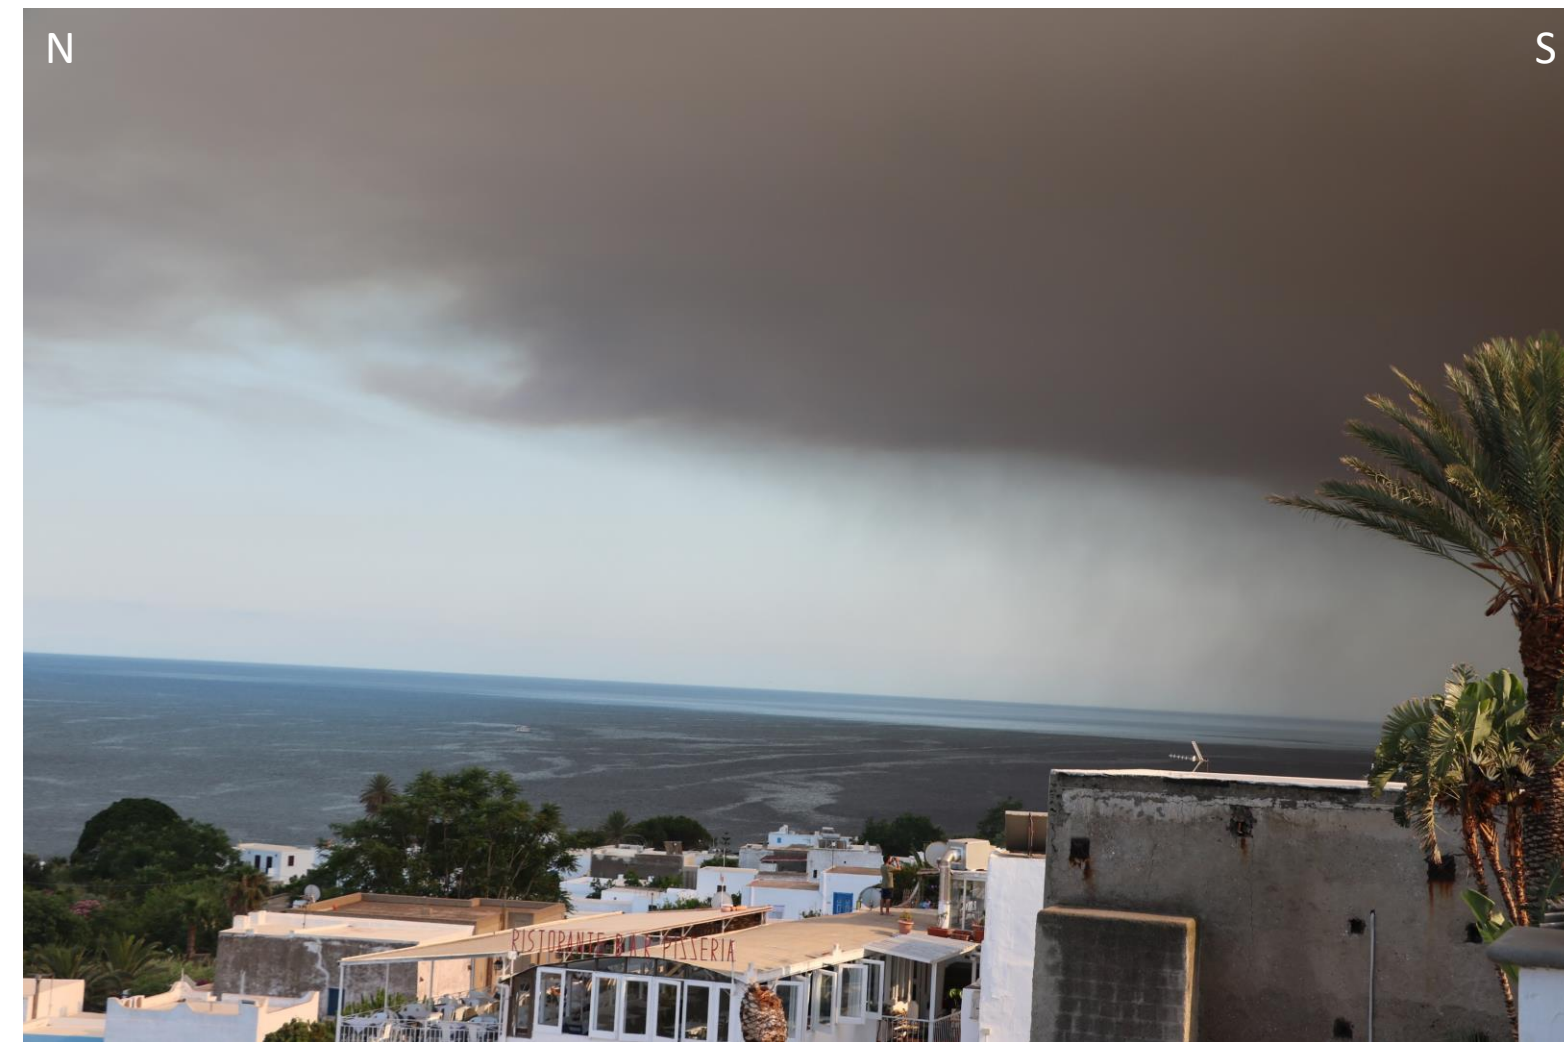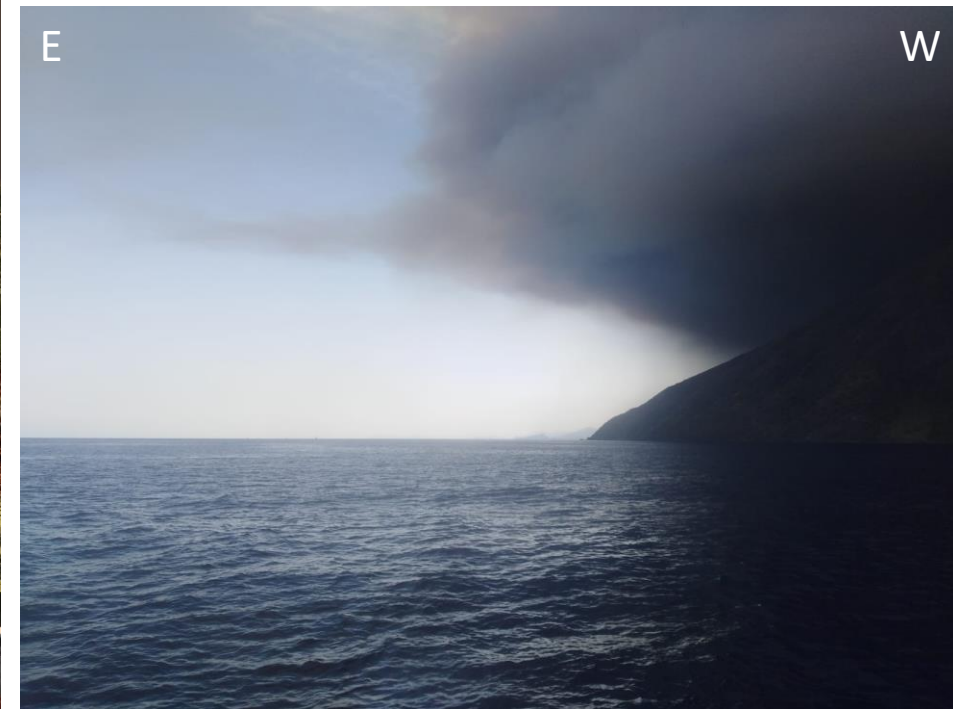

Eruption plume drifted to southwest where Ginostra village was hot by 35-45 minutes of pumice lapilli fall (photo to the left taken from the S. Vincenzo square in Stromboli village; photo to the right taken from offshore courtesy of Alessandro Fabrizi)



Fig. S1i; JUL 3 FALL DEPOSITS

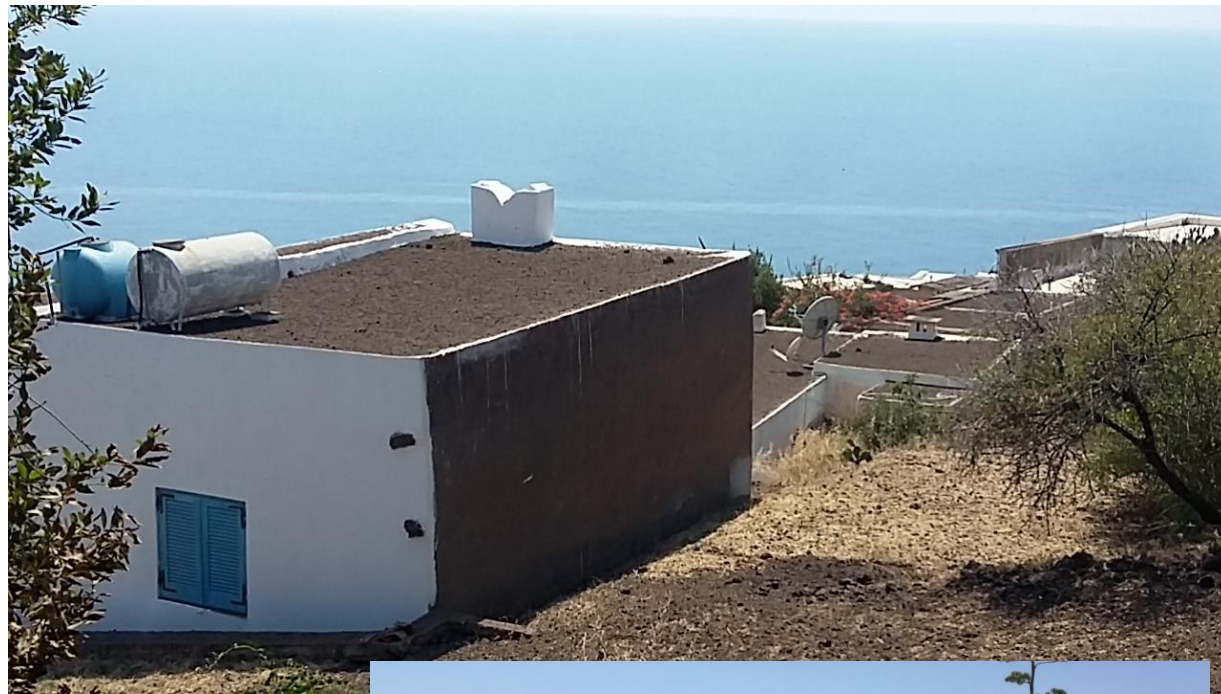

Continuous pumice lapilli cover above house roofs in Ginostra Village

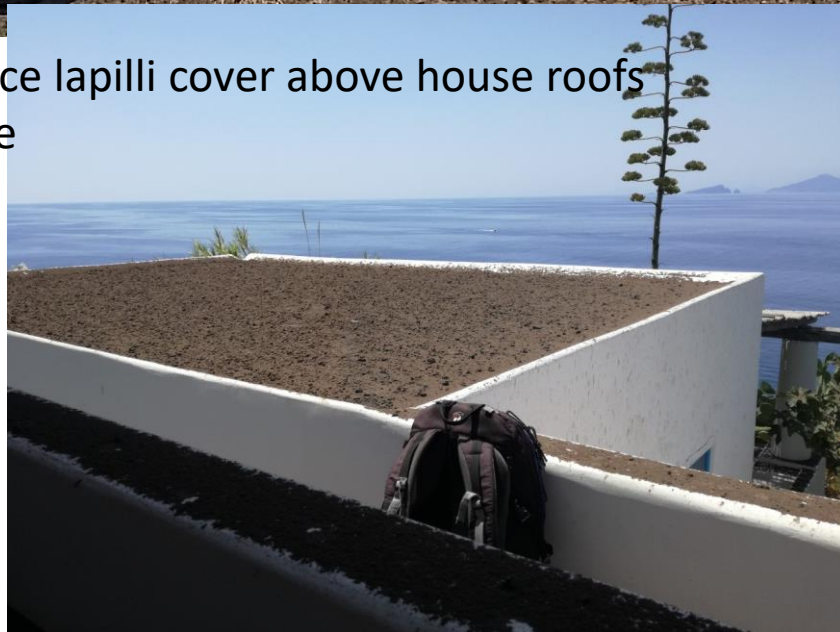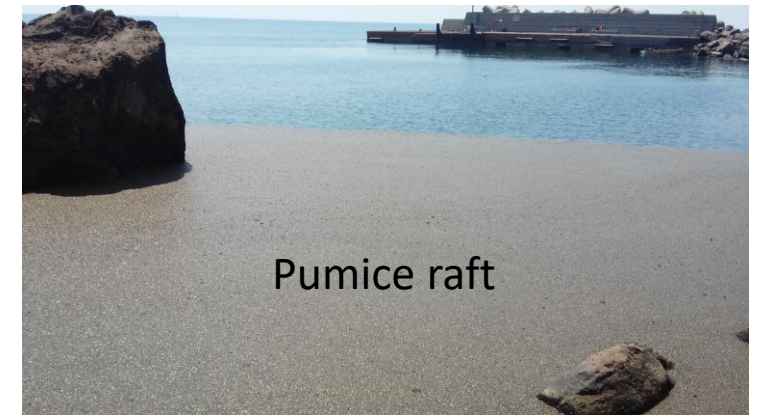

Pumice raft

Continuous pumice lapilli cover at Ginostra Village harbour; pumice rafts float in the bay

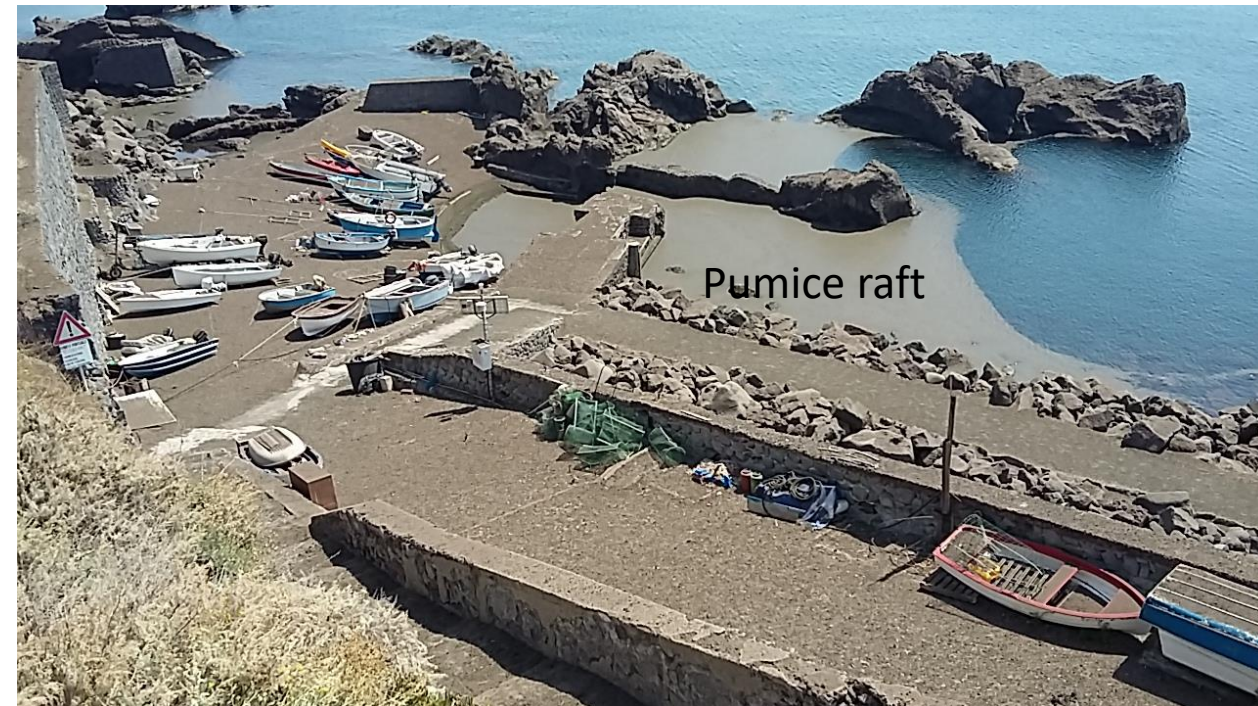

Pumice raft



Fig. S1j; JUL 3 FALL DEPOSITS

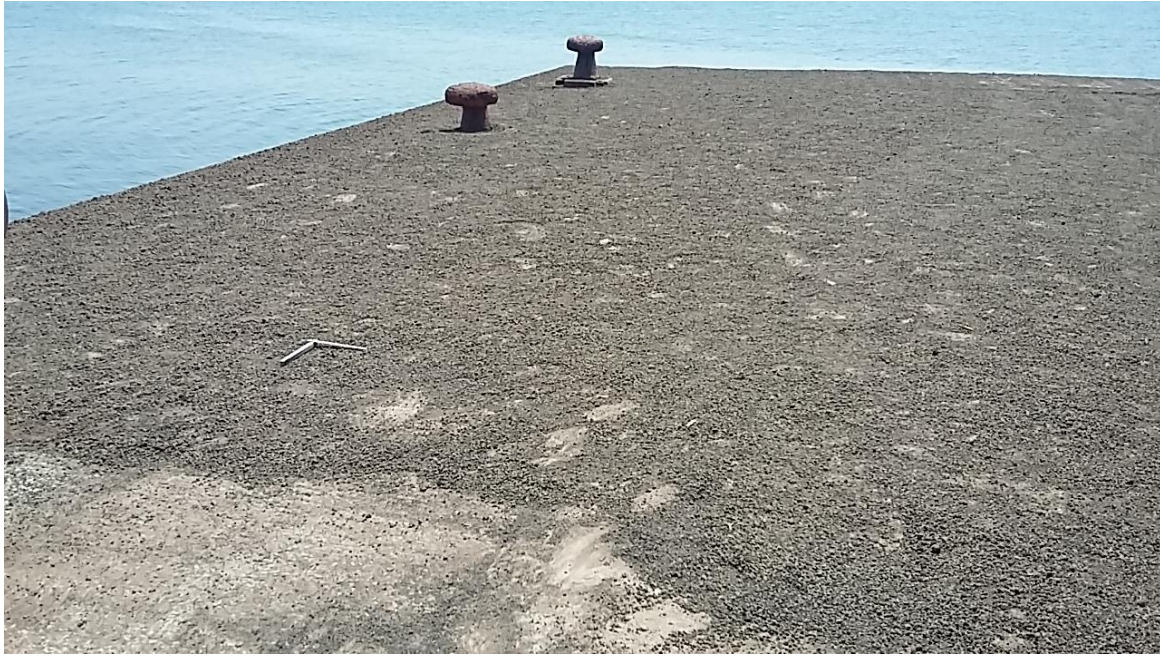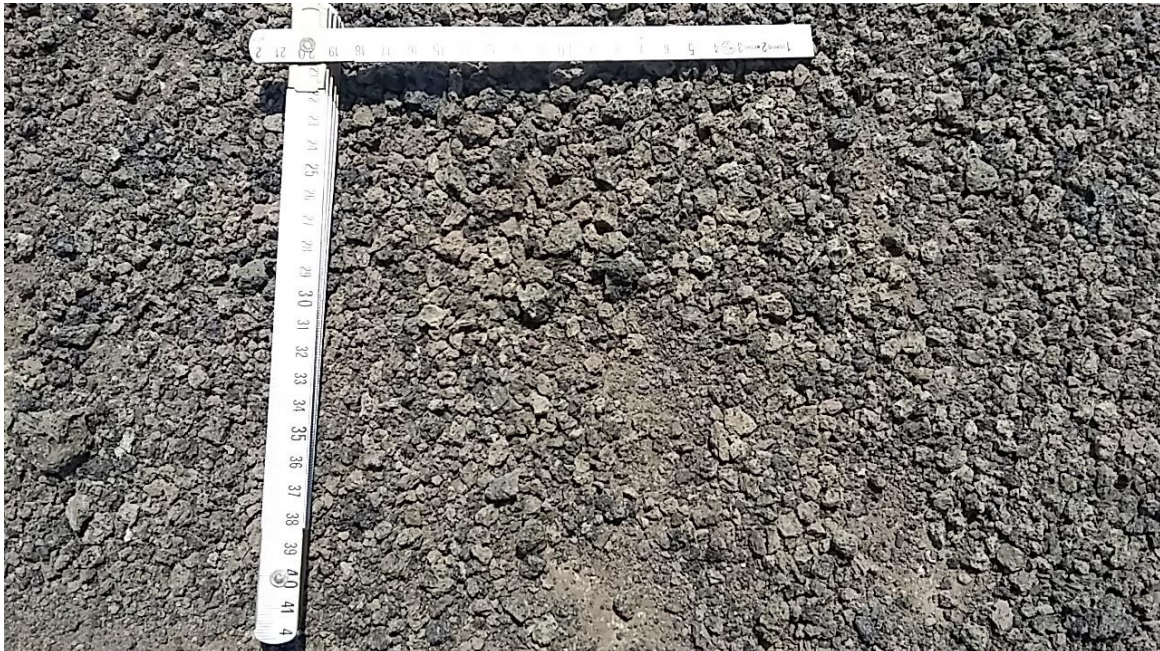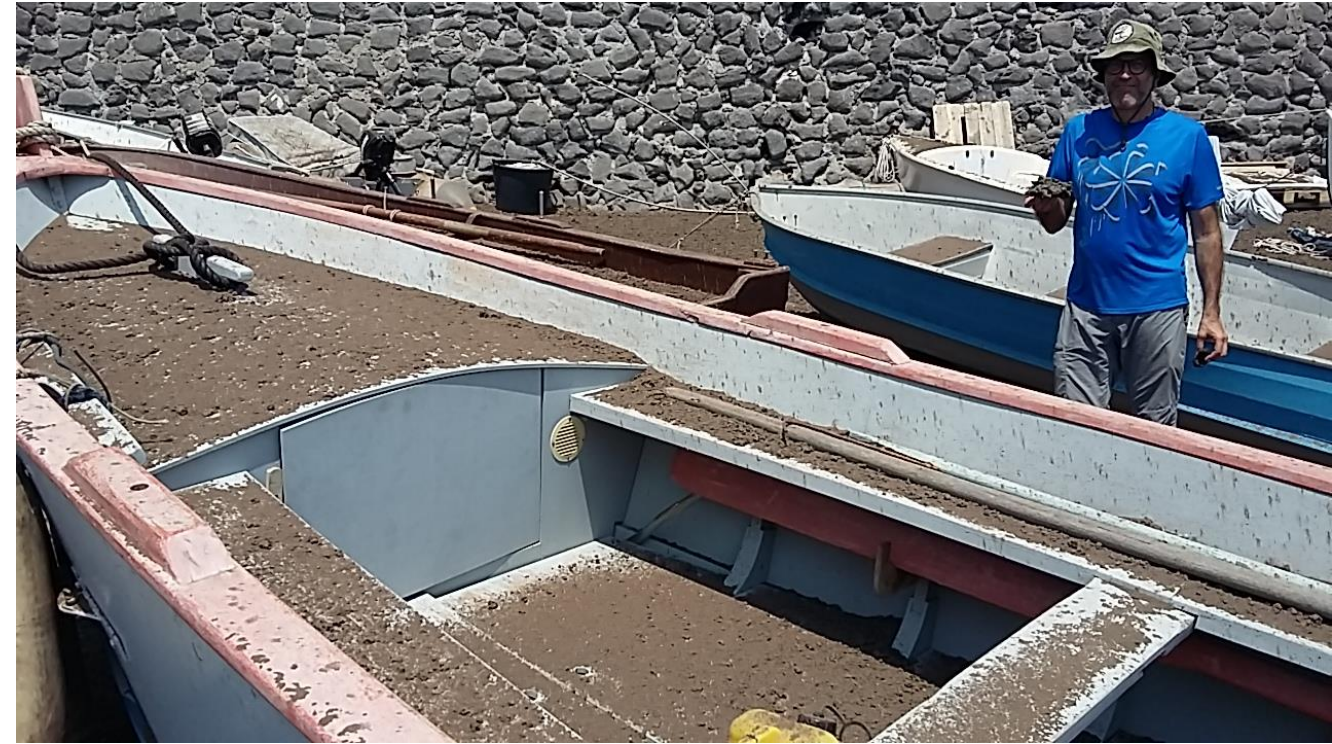

Droplets of fine ash preserved as final fall deposit on a boat at Ginostra harbour

Pumice lapilli at Ginostra pier – GIN1 sampling site, see S3a for location



**Fig. S1k; JUL 3 PYROCLASTIC FLOW DEPOSITS**

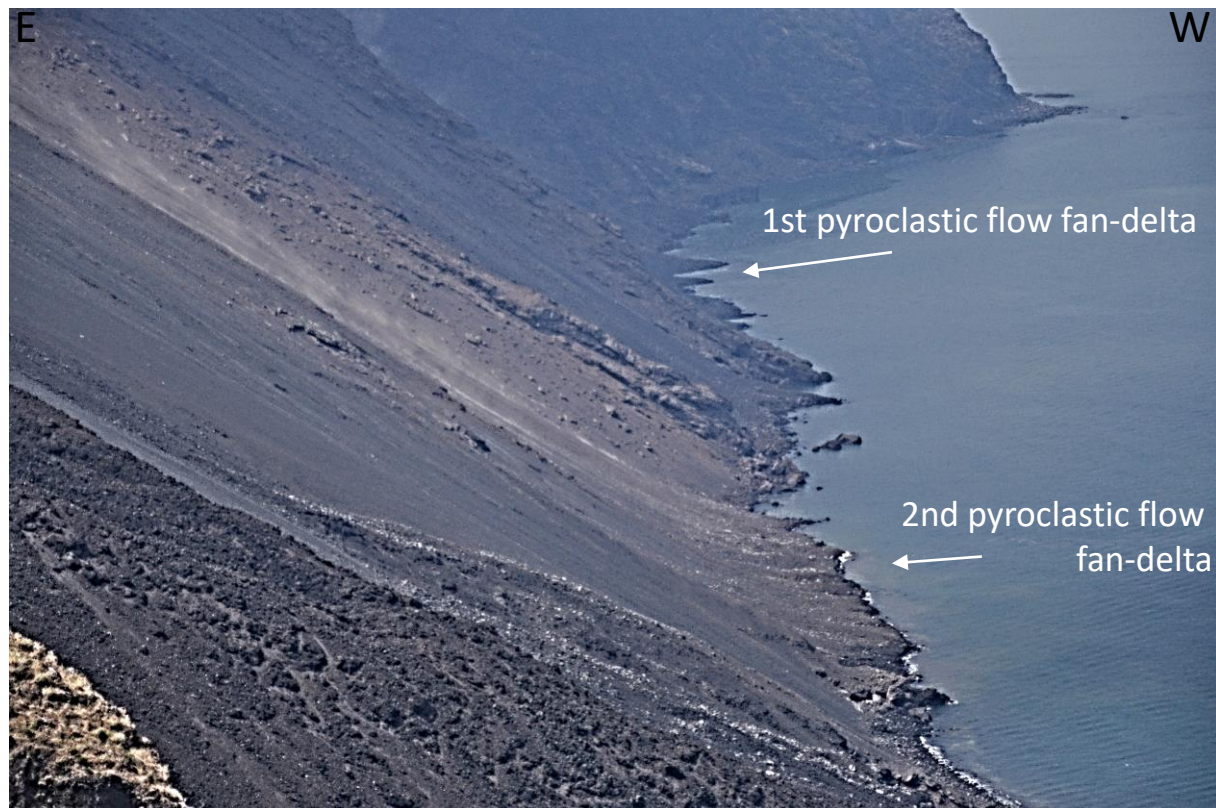

The two pyroclastic flows formed during the July 3 paroxysm left hot, steaming deposits and small fan deltas at the base of the Sciara, later covered by lava blocks and eroded away

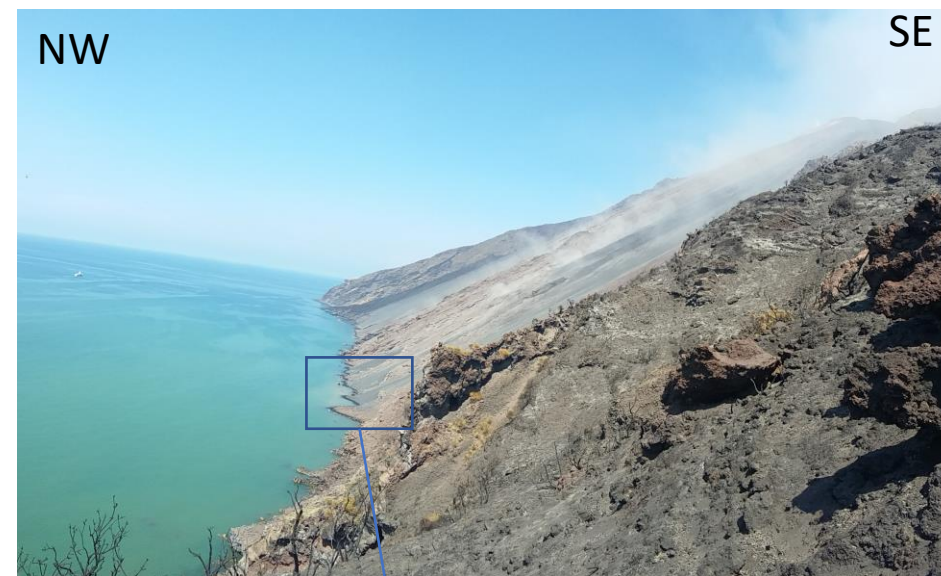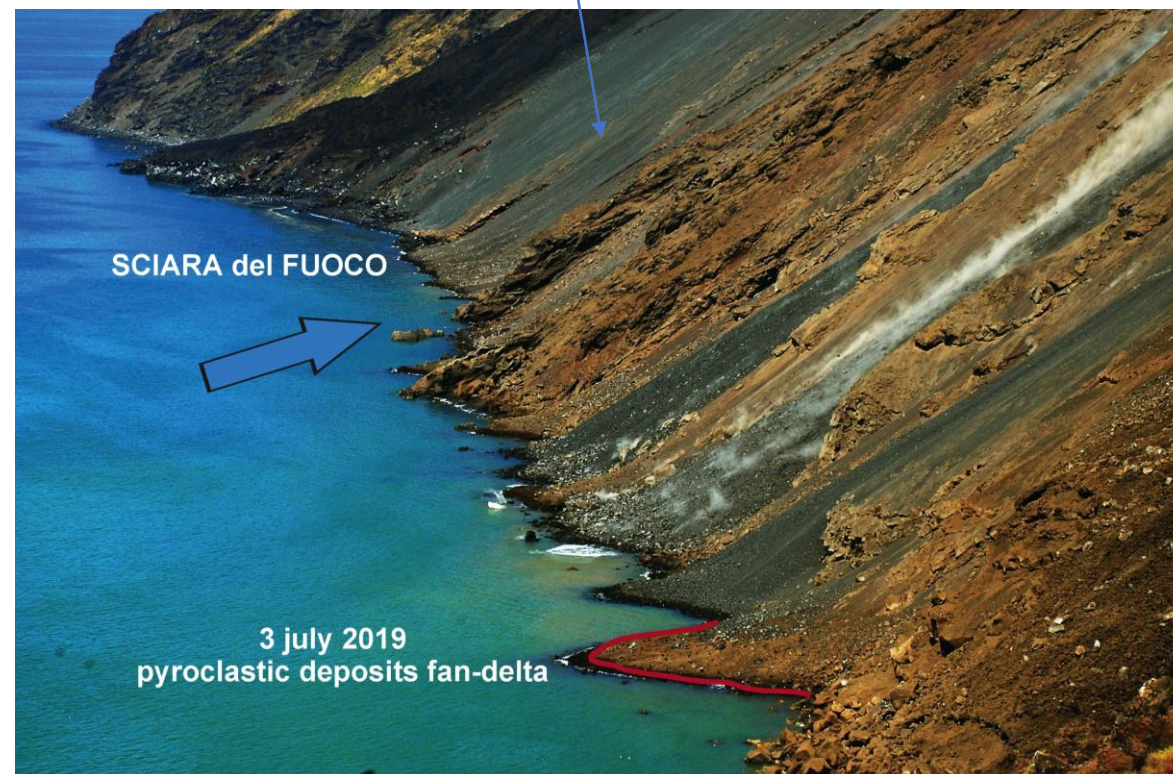



Fig. S1I; JUL 3 FALL DEPOSITS

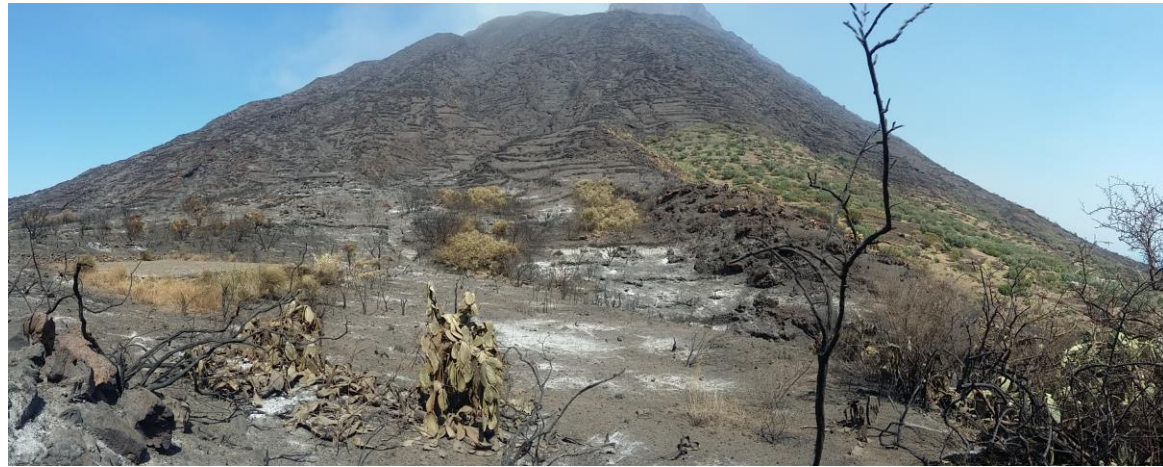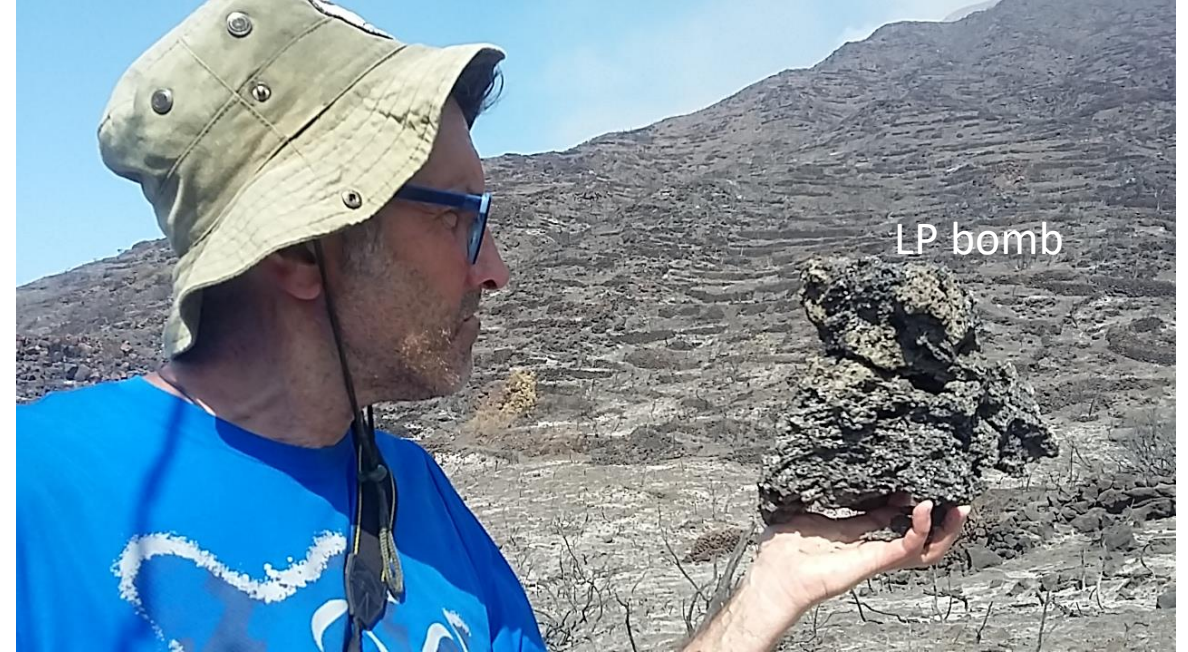

Ballistic bombs of olive-brown (golden) aphyric pumice (LP magma), and lava blocks coated by HP scoria landed incandescent and set fires in the bush around Ginostra at elevations as low as < 200 m a.s.l. GIN 3 and OST13 sampling sites – see S3a for location

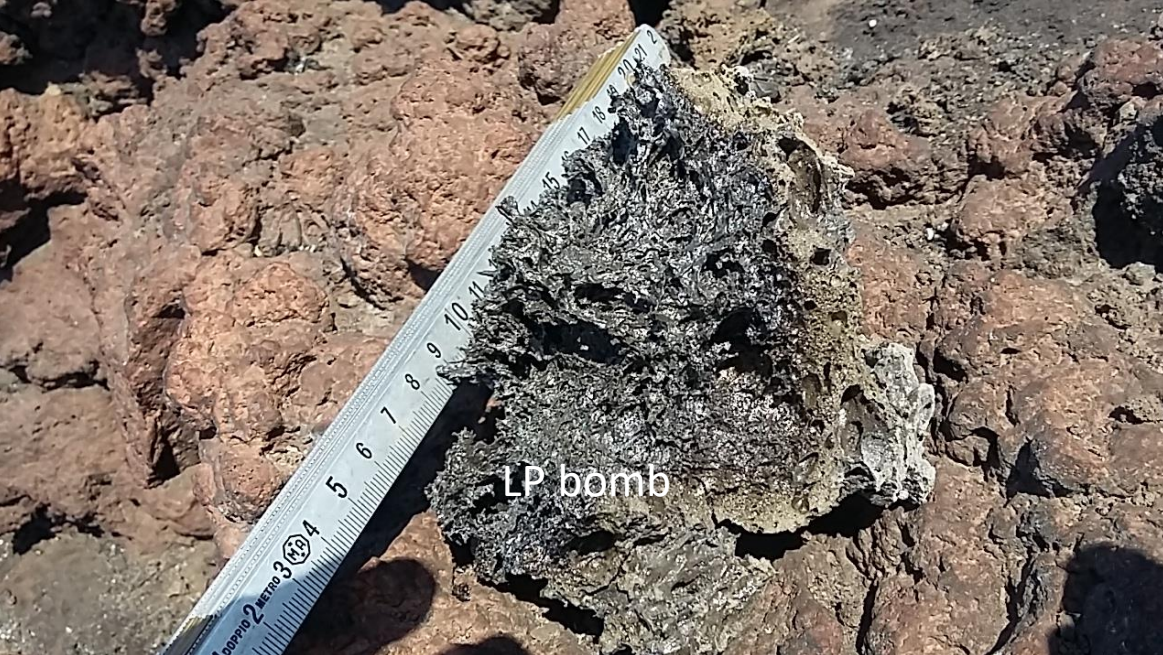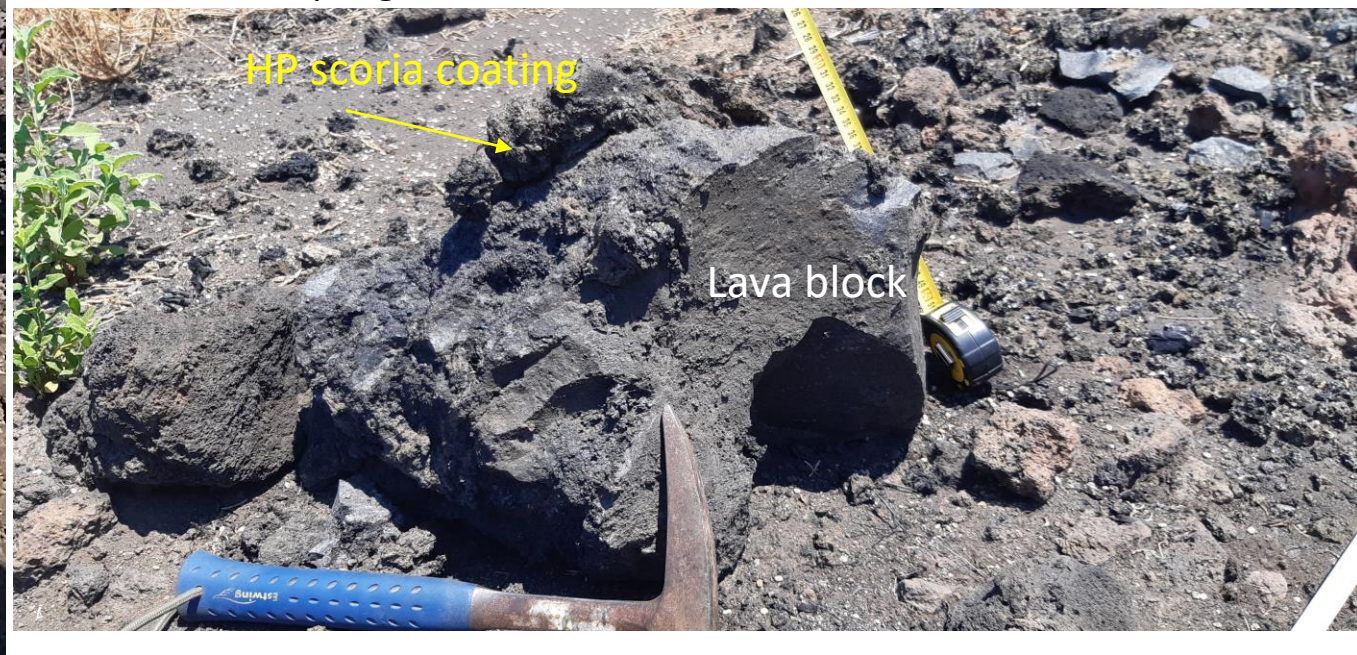



Fig. S1m; JUL 3 FALL DEPOSITS

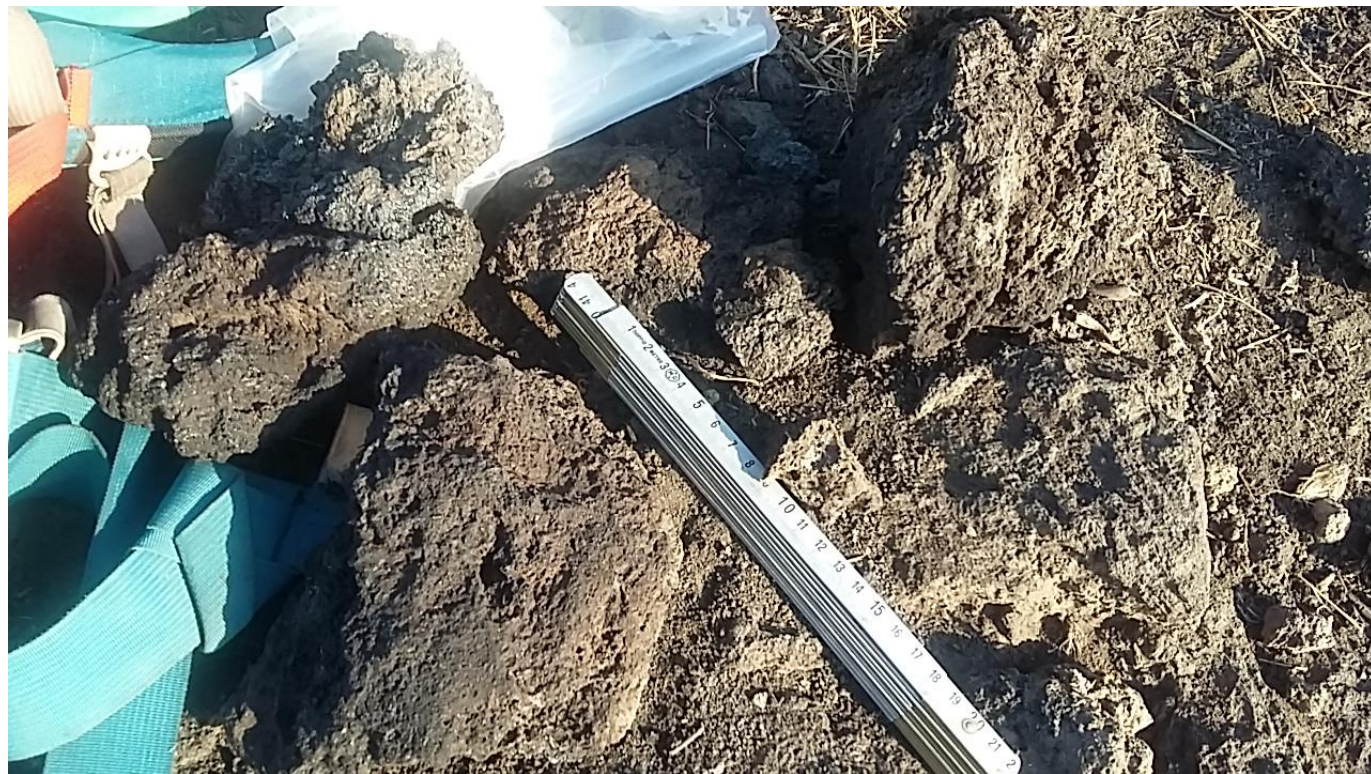

Ballistic bombs on the northern slope of the volcano were mostly made of black-dark porphyritic scoriae (HP magma), found no lower than 400 m a.s.l.  
GIN 5 sampling site – see S3a for location

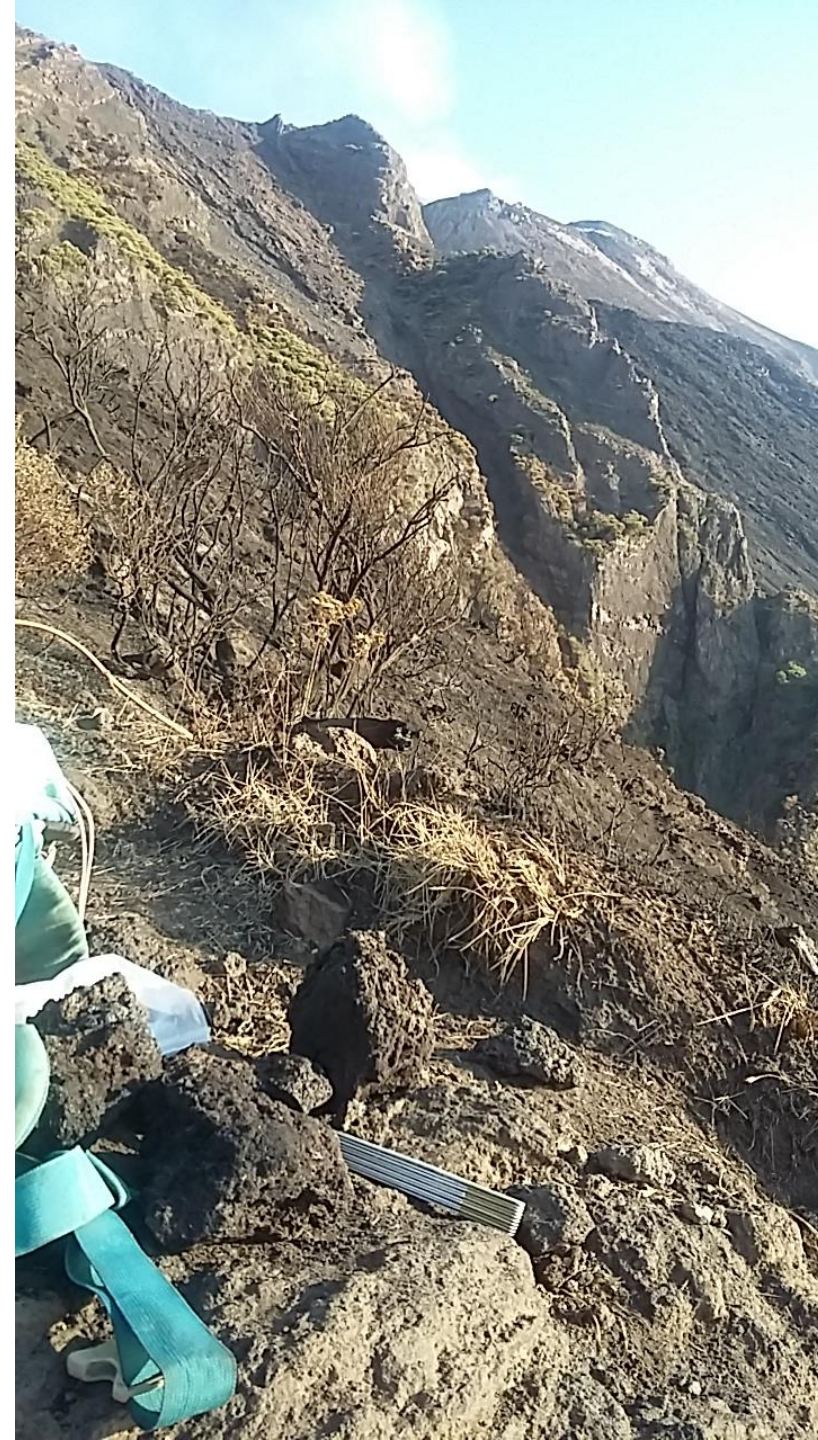



## Fig. S1n; JUL 3 FALL DEPOSITS

Continuous welded spatter cover at Il Pizzo (918 m a.s.l.), 35 cm thick. The photo was taken on September 5, but the welded deposit made of HP spatter at the base and LP spatter atop is entirely attributable to the July 3 paroxysm. The August 28 paroxysm launched in this area only scattered lava blocks. OST22 sampling site; see S3a for location

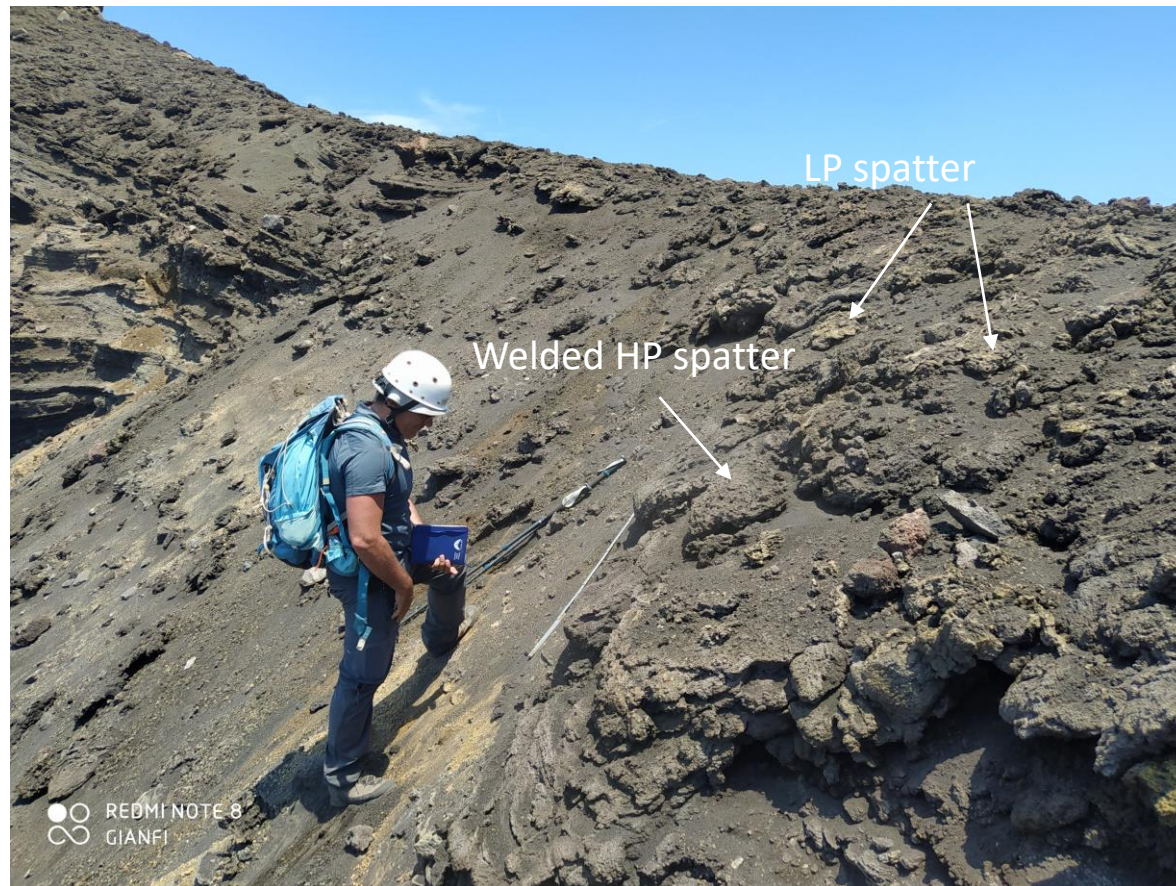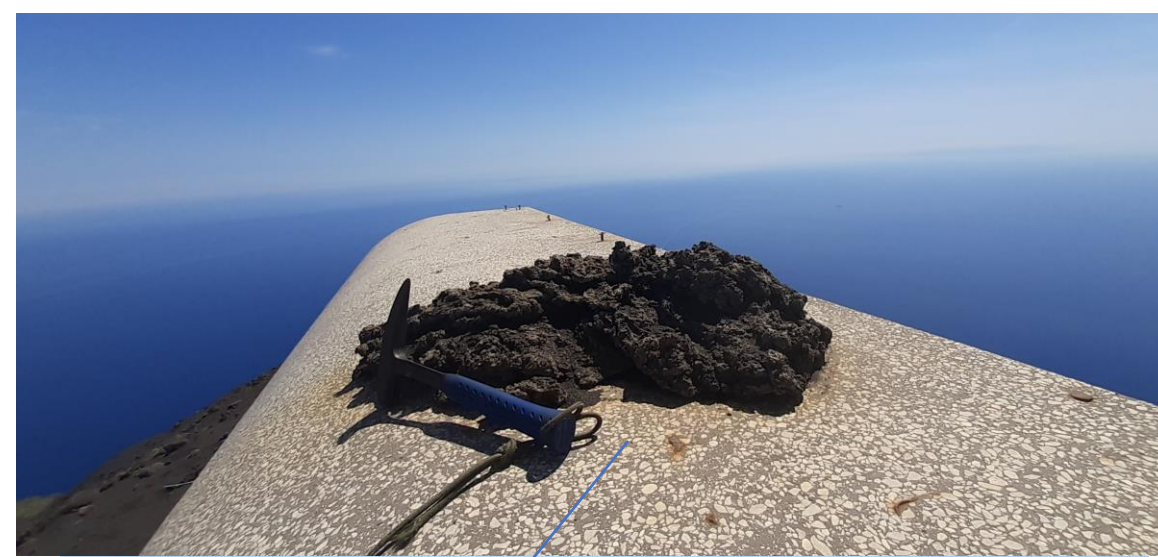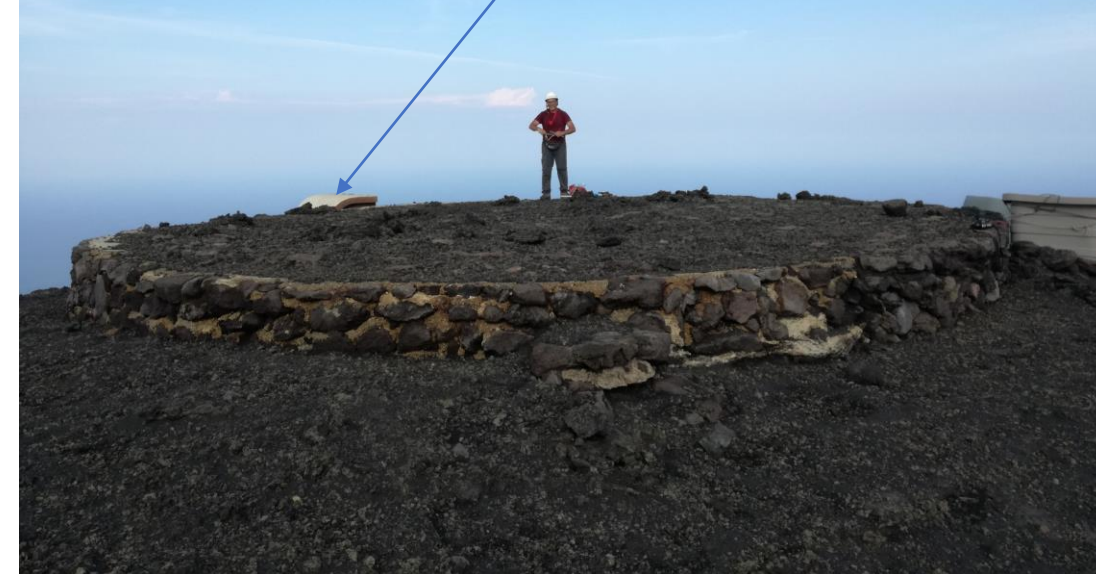

Scattered LP spatter bombs of July 3 eruption at summit Helipad (850 m a.s.l.); we counted 22 of them on the 70 m<sup>2</sup> of the helipad, the largest 120 cm in max diameter  
MEG 17 sampling site; see S3 for location



**Fig. S1o; 28 AUGUST 2019 FALL DEPOSITS**

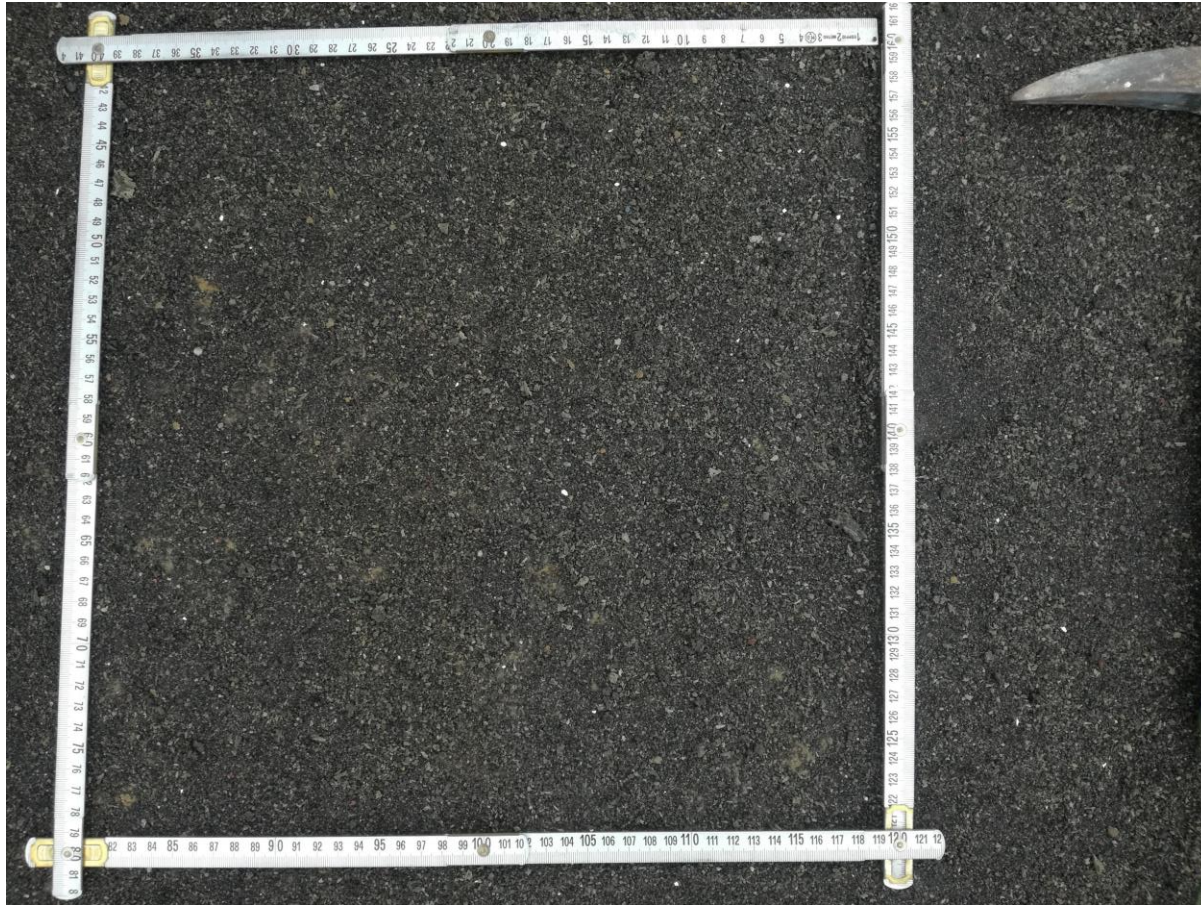

Pumice coarse ash & small lapilli fall in Stromboli village  
MEG 2 sampling site – See S3b for location

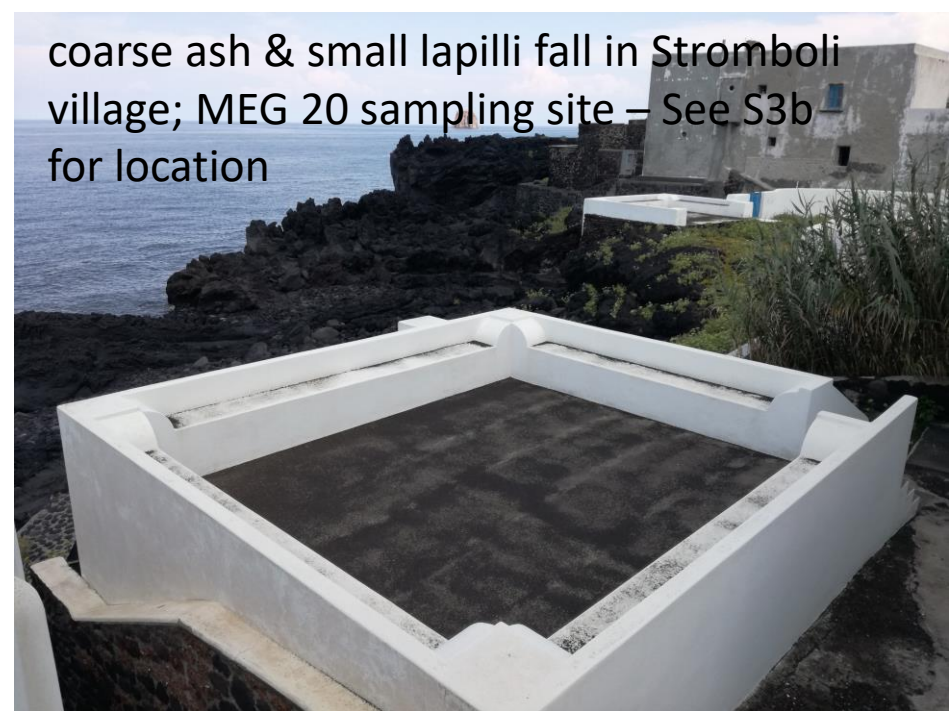

coarse ash & small lapilli fall in Stromboli  
village; MEG 20 sampling site – See S3b  
for location

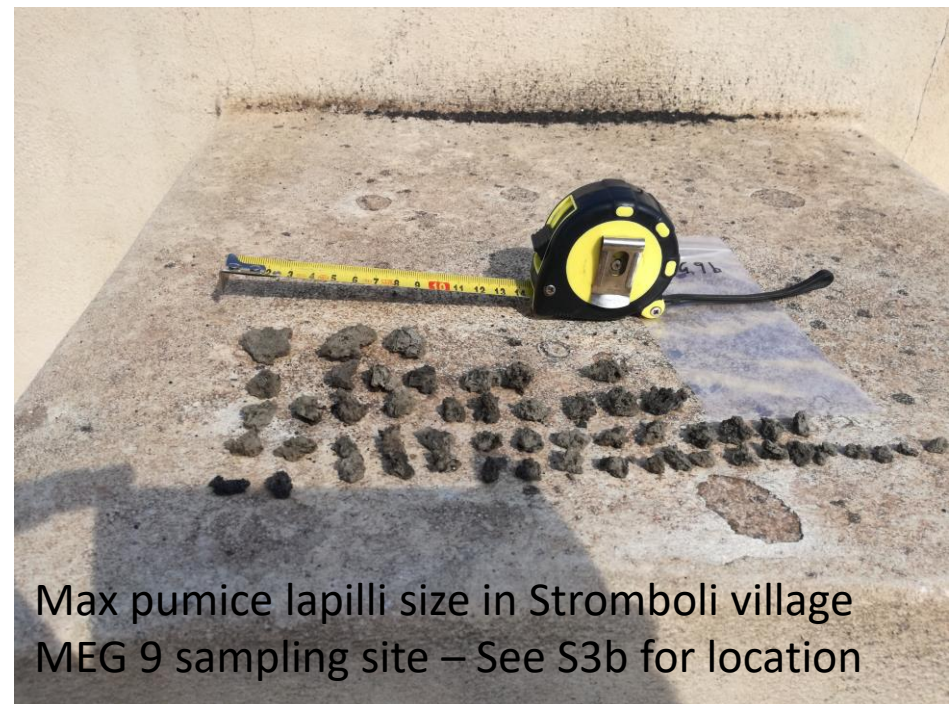

Max pumice lapilli size in Stromboli village  
MEG 9 sampling site – See S3b for location
