# Supplementary material for: The summer 2019 basaltic Vulcanian eruptions (paroxysms) of Stromboli
Source: Springer Nature journal article supplement (doi:10.1007/s00445-020-01423-2), 2020-12-03
Supplement: 445_2020_1423_MOESM5_ESM.pdf [file 445_2020_1423_MOESM5_ESM.pdf]

SUPPLEMENTARY MATERIAL S4 - Giordano&DeAstis, 2020, Bull Volc  
DENSITY MEASUREMENTS

| SAMPLE           | WEIGHT (g) | VOLUME (cm3) | DENSITY | TYPE |
|------------------|------------|--------------|---------|------|
| GIN2A            | 9,87       | 14           | 0,71    | LP   |
| GIN2B            | 7,87       | 12,5         | 0,63    | LP   |
| STRA2606A        | 29,48      | 19           | 1,55    | HP   |
| STRA2606B        | 24         | 17           | 1,41    | HP   |
| GIN3A            | 16,51      | 33           | 0,50    | LP   |
| GIN3B            | 27,7       | 45           | 0,62    | LP   |
| GIN3C            | 22,75      | 30           | 0,76    | LP   |
| GIN3D            | 13,39      | 32           | 0,42    | LP   |
| GIN5             | 134        | 180          | 0,74    | LP   |
| BALLISTIC HP 3.7 | 575,35     | 625          | 0,92    | HP   |
| BULK PUMICE RAFT | 954,35     | 3500         | 0,27    | LP   |
