# Supplementary material for: The summer 2019 basaltic Vulcanian eruptions (paroxysms) of Stromboli
Source: Springer Nature journal article supplement (doi:10.1007/s00445-020-01423-2), 2020-12-03
Supplement: 445_2020_1423_MOESM6_ESM.pdf [file 445_2020_1423_MOESM6_ESM.pdf]

S5 - SUPPLEMENTARY MATERIAL; Giordano&De Astis 2020, Bull Volc  
GRAIN SIZE DATA (SEE S3 FOR SAMPLING LOCATIONS)

| sample | total weight (g) | weight per grain size class (g) |        |        |        |        |         |          |           |           |           | TOT (g) |
|--------|------------------|---------------------------------|--------|--------|--------|--------|---------|----------|-----------|-----------|-----------|---------|
|        |                  | >16 mm                          | >8 mm  | >4 mm  | >2 mm  | >1 mm  | >0.5 mm | >0.25 mm | >0.125 mm | >0.063 mm | <0.063 mm |         |
| GIN1   | 340,90           | 9,50                            | 66,30  | 88,60  | 94,10  | 55,85  | 13,35   | 2,75     | 2,35      | 3,75      | 3,85      | 340,40  |
| GIN6   | 1084,90          | 55,80                           | 279,00 | 263,80 | 194,05 | 125,05 | 54,20   | 23,45    | 28,00     | 46,60     | 14,50     | 1084,45 |
| GIN7   | 2219,60          | 143,10                          | 301,90 | 250,35 | 236,10 | 258,60 | 229,00  | 281,55   | 369,15    | 114,80    | 32,50     | 2217,05 |
| GIN8   | 723,95           | 4,70                            | 83,25  | 142,55 | 157,55 | 129,40 | 60,95   | 36,20    | 39,35     | 54,25     | 15,25     | 723,45  |

|          |        |      |      |      |       |        |        |        |        |       |       |        |
|----------|--------|------|------|------|-------|--------|--------|--------|--------|-------|-------|--------|
| MEG1     | 260,80 | 0,00 | 0,00 | 4,58 | 23,04 | 64,14  | 67,79  | 16,61  | 10,70  | 25,27 | 48,00 | 260,13 |
| MEG3     | 208,52 | 0,00 | 0,00 | 3,05 | 12,20 | 62,69  | 79,87  | 20,62  | 9,91   | 12,45 | 7,43  | 208,22 |
| MEG4     | 115,14 | 0,00 | 0,00 | 1,15 | 3,77  | 25,40  | 48,32  | 24,06  | 7,54   | 2,04  | 2,17  | 114,45 |
| MEG5     | 188,06 | 0,00 | 0,00 | 0,40 | 1,99  | 31,73  | 79,59  | 40,89  | 15,77  | 9,54  | 7,83  | 187,74 |
| MEG6     | 961,75 | 0,00 | 0,00 | 6,54 | 34,76 | 118,32 | 206,29 | 278,84 | 197,11 | 68,82 | 49,10 | 959,78 |
| MEG5VERA | 648,10 | 0,00 | 0,00 | 2,35 | 14,83 | 114,94 | 248,47 | 112,41 | 45,86  | 60,53 | 48,34 | 647,73 |
| MEG9     | 344,21 | 0,00 | 0,00 | 0,90 | 4,68  | 27,84  | 97,02  | 103,40 | 76,01  | 22,22 | 11,63 | 343,70 |
| MEG20    | 298,81 | 0,00 | 0,00 | 0,00 | 1,16  | 52,30  | 123,80 | 48,51  | 13,33  | 18,49 | 40,52 | 298,11 |
| MEG22    | 242,48 | 0,00 | 0,00 | 0,00 | 0,65  | 31,24  | 91,72  | 37,22  | 13,05  | 21,14 | 46,92 | 241,94 |

|          | % of weight per grain size class |              |              |              |              |             |             |             |             |             |     | TOT wt% |
|----------|----------------------------------|--------------|--------------|--------------|--------------|-------------|-------------|-------------|-------------|-------------|-----|---------|
|          | >16 mm                           | >8 mm        | >4 mm        | >2 mm        | >1 mm        | >0.5 mm     | >0.25 mm    | >0.125 mm   | >0.063 mm   | <0.063 mm   |     |         |
| GIN1     | 2,79                             | 19,48        | 26,03        | 27,64        | 16,41        | 3,92        | 0,81        | 0,69        | 1,10        | 1,13        | 100 |         |
| GIN6     | 5,15                             | 25,73        | 24,33        | 17,89        | 11,53        | 5,00        | 2,16        | 2,58        | 4,30        | 1,34        | 100 |         |
| GIN7     | 6,45                             | 13,62        | 11,29        | 10,65        | 11,66        | 10,33       | 12,70       | 16,65       | 5,18        | 1,47        | 100 |         |
| GIN8     | 0,65                             | 11,51        | 19,70        | 21,78        | 17,89        | 8,42        | 5,00        | 5,44        | 7,50        | 2,11        | 100 |         |
| GIN TGSD | <b>3,76</b>                      | <b>17,58</b> | <b>20,34</b> | <b>19,49</b> | <b>14,37</b> | <b>6,92</b> | <b>5,17</b> | <b>6,34</b> | <b>4,52</b> | <b>1,51</b> | 100 |         |

|      |      |      |      |      |       |       |       |      |      |       |     |
|------|------|------|------|------|-------|-------|-------|------|------|-------|-----|
| MEG1 | 0,00 | 0,00 | 1,76 | 8,86 | 24,66 | 26,06 | 6,39  | 4,11 | 9,71 | 18,45 | 100 |
| MEG3 | 0,00 | 0,00 | 1,46 | 5,86 | 30,11 | 38,36 | 9,90  | 4,76 | 5,98 | 3,57  | 100 |
| MEG4 | 0,00 | 0,00 | 1,00 | 3,29 | 22,19 | 42,22 | 21,02 | 6,59 | 1,78 | 1,90  | 100 |

|          |  |      |      |             |             |              |              |              |             |             |             |     |
|----------|--|------|------|-------------|-------------|--------------|--------------|--------------|-------------|-------------|-------------|-----|
| MEG5     |  | 0,00 | 0,00 | 0,21        | 1,06        | 16,90        | 42,39        | 21,78        | 8,40        | 5,08        | 4,17        | 100 |
| MEG5VERA |  | 0,00 | 0,00 | 0,36        | 2,29        | 17,75        | 38,36        | 17,35        | 7,08        | 9,34        | 7,46        | 100 |
| MEG6     |  | 0,00 | 0,00 | 0,68        | 3,62        | 12,33        | 21,49        | 29,05        | 20,54       | 7,17        | 5,12        | 100 |
| MEG9     |  | 0,00 | 0,00 | 0,26        | 1,36        | 8,10         | 28,23        | 30,08        | 22,12       | 6,46        | 3,38        | 100 |
| MEG20    |  | 0,00 | 0,00 | 0,00        | 0,39        | 17,54        | 41,53        | 16,27        | 4,47        | 6,20        | 13,59       | 100 |
| MEG22    |  | 0,00 | 0,00 | 0,00        | 0,27        | 12,91        | 37,91        | 15,38        | 5,39        | 8,74        | 19,39       | 100 |
| MEG TGSD |  | 0,00 | 0,00 | <b>0,64</b> | <b>3,00</b> | <b>18,05</b> | <b>35,17</b> | <b>18,58</b> | <b>9,27</b> | <b>6,72</b> | <b>8,56</b> | 100 |
