# Supplementary material for: The summer 2019 basaltic Vulcanian eruptions (paroxysms) of Stromboli
Source: Springer Nature journal article supplement (doi:10.1007/s00445-020-01423-2), 2020-12-03
Supplement: 445_2020_1423_MOESM7_ESM.pdf [file 445_2020_1423_MOESM7_ESM.pdf]

| ID | explosion | sample/site         | type           | diameters cm | eq diameter ( landing dis elevation respect to vent (m) |         |                | exit angles | lag fall time (s) | density (kg m <sup>-3</sup> ) |
|----|-----------|---------------------|----------------|--------------|---------------------------------------------------------|---------|----------------|-------------|-------------------|-------------------------------|
| 1  | June 25   |                     | lava block     | 30x20x21     | 23.6                                                    | 250     | 115 (895 asl)  |             |                   | 2500*                         |
| 2  | June 25   |                     | HP spatter     | 80x20x50     | 50                                                      | 250     | 115 (895 asl)  |             |                   | 1500                          |
| 3  | June 25   |                     | HP scoria bomb | 44x20x20     | 21                                                      | 250     | 115 (895 asl)  |             |                   | 1500                          |
| 4  | June 25   |                     | HP scoria bomb | 45x18x30     | 31                                                      | 250     | 115 (895 asl)  |             |                   | 1500                          |
| 5  | June 25   |                     | lava block     | 25x20x18     | 21                                                      | 350     | 60 (840 asl)   |             |                   | 2500*                         |
| 6  | July 3    | Fig. 5 in main text | spatters       |              | 10-100                                                  | ca. 500 | -30 (750 asl)  | >30         | 07-20 s           | 600-1500                      |
| 7  | July 3    | MEG 17s             | spatter        | 101x60x20    | 60                                                      | 500     | 70 (850 asl)   |             |                   | 600-1500                      |
| 8  | July 3    | MEG 17s             | spatter        | 105x75x20    | 66                                                      | 500     | 70 (850 asl)   |             |                   | 600-1500                      |
| 9  | July 3    | MEG 17s             | spatter        | 120x80x20    | 73                                                      | 500     | 70 (850 asl)   |             |                   | 600-1500                      |
| 10 | July 3    | MEG 17s             | spatter        | 82x45x20     | 49                                                      | 500     | 70 (850 asl)   |             |                   | 600-1500                      |
| 11 | July 3    | MEG 17s             | spatter        | 65x70x20     | 53                                                      | 500     | 70 (850 asl)   |             |                   | 600-1500                      |
| 12 | July 3    | MEG16a              | spatter        | 89x68x22     | 60                                                      | 682     | -20 (760 asl)  |             |                   | 600-1500                      |
| 13 | July 3    | MEG16b              | spatter        | 38x28x15     | 27                                                      | 682     | -20 (760 asl)  |             |                   | 600-1500                      |
| 14 | July 3    | GIN2                | LP bomb        |              | 27                                                      | 1638    | -682 (98 asl)  |             |                   | 650                           |
| 15 | July 3    | GIN3                | LP bomb        |              | 18                                                      | 1640    | -647 (133 asl) |             |                   | 600                           |
| 16 | July 3    | GIN5                | LP bomb        |              | 19                                                      | 1145    | -364 (416 asl) |             |                   | 740                           |
| 17 | July 3    | Fig. 3 in main text | lava blocks?   | m-sized?     | NA                                                      | >1300   | -780 (0 asl)   | 20-60       | 20-25 s           | 2500*                         |
|    |           |                     |                |              | phimax                                                  |         |                |             |                   |                               |
| 18 | Aug 28    | MEG17B              | lava blocks    |              | 55.3                                                    | 328     | 94 (874 asl)   | >50         |                   | 2500*                         |
| 19 | Aug 28    | MEG17               | lava blocks    |              | 80.2                                                    | 488     | 71 (851 asl)   | >50         |                   | 2500*                         |
| 20 | Aug 28    | MEG16               | lava blocks    |              | 23.3                                                    | 681     | -46 (734 asl)  | >50         |                   | 2500*                         |
| 21 | Aug 28    | MEG15               | HP scoria bomb |              | 10.4                                                    | 1015    | -273 (507 asl) | >50         |                   | 1500                          |
| 22 | Aug 28    | MEG14               | HP scoria bomb |              | 7.3                                                     | 1314    | -410 (370 asl) |             |                   | 1500                          |
| 23 | Aug 28    | MEG25               | LP bomb        |              | 6.8                                                     | 1344    | -484 (296 asl) |             |                   | 600                           |
| 24 | Aug 28    | MEG26               | HP scoria bomb |              | 6.8                                                     | 1420    | -540 (240 asl) |             |                   | 1500                          |
| 25 | Aug 28    | MEG27               | HP scoria bomb |              | 6.2                                                     | 1446    | -527 (253 asl) |             |                   | 1500                          |
| 26 | Aug 28    | MEG12               | LP bomb        |              | 8.6                                                     | 1536    | -517 (263 asl) |             |                   | 600                           |

\* average density of lava from Apuani et al 2005

**BALLISTIC SIMULATIONS SELECTED RESULTS (input data from ID 1-26)  
 crater at 780 m a.s.l.**

| JULY 3 | Input conditions        |        |                              |                                  |               |              | selected best fit results |                 |        | Ugas* |
|--------|-------------------------|--------|------------------------------|----------------------------------|---------------|--------------|---------------------------|-----------------|--------|-------|
|        | eq diameter (m)         | shape  | density (kg m <sup>3</sup> ) | dH of landing (r exit angle (°)) | exit velocity | distance (m) | max height                | travel time (s) |        |       |
|        | 0.5 (average ID6)       | sphere | 600                          | 0                                | 45-80         | 100          | 348                       | 494.3           | no fit |       |
|        | 0.2 (small size ID6)    | sphere | 1500                         | 0                                | 40-80         | 100          | 587.6                     | 419.5           | no fit |       |
|        |                         |        |                              |                                  |               | 100          | 314.6                     | 460.7           | no fit |       |
|        | 0.2 (average GIN2-GIN3) | sphere | 600                          | -650                             | 30-50         | 100          | no fit                    | no fit          | no fit |       |
|        | 0.2 (average GIN2-GIN3) | sphere | 1500                         | -650                             | 30-60         | 100          | no fit                    | no fit          | no fit |       |
|        | 0.2 (average GIN2-GIN3) | sphere | 600                          | -650                             | 30-60         | 120          | no fit                    | no fit          | no fit |       |

|                         |           |            |      |       |            |               |        |             |              |
|-------------------------|-----------|------------|------|-------|------------|---------------|--------|-------------|--------------|
| 0.2 (average GIN2-GIN3) | sphere    | 1500       | -650 | 30    | <b>120</b> | <b>1548.6</b> | 162    | 19.3        | <b>144</b>   |
|                         |           | 1500       | -650 | 40    | <b>120</b> | <b>1531.6</b> | 261    | 21.6        |              |
|                         |           | 1500       | -650 | 50-60 | 120        | no fit        | no fit | no fit      |              |
| 0.2 (average GIN2-GIN3) | sphere    | <b>600</b> | -350 | 30    | <b>120</b> | <b>1078.5</b> | 140.6  | 16          | <b>135</b>   |
|                         |           | 600        | -350 | 40    | <b>120</b> | <b>1072.9</b> | 222.4  | 18.1        |              |
|                         |           |            |      | 50-60 | 120        | no fit        | no fit | no fit      |              |
| 0.27 (GIN2)             | sphere    | 650        | -682 | 30-40 | 120-150    | no fit        | no fit | no fit      |              |
|                         |           | <b>650</b> | -682 | 30    | <b>160</b> | <b>1656</b>   | 226.2  | 21.7        | <b>178.5</b> |
|                         |           | 650        | -682 | 40    | <b>160</b> | <b>1629.6</b> | 353    | 24.3        |              |
| 0.19 (GIN5)             | sphere    | 740        | -364 | 40-50 | 140-160    | no fit        | no fit | no fit      |              |
|                         |           | <b>740</b> | -364 | 50    | <b>130</b> | <b>1154.5</b> | 359.2  | 21.3        | <b>146</b>   |
|                         |           | 740        | -364 | 40    | 130        | no fit        | no fit | no fit      |              |
|                         |           | <b>740</b> | -364 | 40    | <b>120</b> | <b>1145.9</b> | 231.7  | 18.5        | <b>136</b>   |
| 0.73 (MEG17s)           | sphere    | 1000       | 70   | 30-60 | 100        | no fit        | no fit | no fit      |              |
|                         |           | 1000       | 70   | 70    | <b>100</b> | <b>555.7</b>  | 416.6  | no fit      |              |
|                         |           | 1000       | 70   | 30-70 | 120        | no fit        | no fit | no fit      |              |
| 0.73 (MEG17s)           | low cube  | 600-1500   | 70   | 30    | 120        | no fit        | no fit | no fit      |              |
|                         |           | <b>600</b> | 70   | 30    | <b>120</b> | <b>572.9</b>  | 125    | <b>8.1</b>  |              |
|                         |           | 600        | 70   | 40    | <b>120</b> | <b>637.4</b>  | 193.6  | <b>11</b>   |              |
|                         |           | 600        | 70   | 50    | <b>120</b> | <b>621.8</b>  | 263    | <b>13.3</b> |              |
| 0.73 (MEG17s)           | high cube | 600        | 70   | 30    | <b>120</b> | <b>609.1</b>  | 129.5  | <b>8.4</b>  |              |
| 0.73 (MEG17s)           | low cube  | 1000       | 70   | 30    | <b>100</b> | <b>606.7</b>  | 231.7  | <b>12.5</b> |              |
| 0.27 (MEG16b)           | sphere    | 600        | -46  | 45    | <b>100</b> | <b>742.4</b>  | 208    | <b>13.3</b> |              |
| 0.89 (MEG16a)           | low cube  | <b>600</b> | -46  | 40    | 100        | no fit        | no fit | no fit      |              |
|                         |           |            |      | 40    | <b>110</b> | <b>668.4</b>  | 176.4  | <b>12.3</b> |              |
|                         |           |            |      | 40    | <b>120</b> | <b>735</b>    | 199.6  | <b>13</b>   |              |
| 1 (ID 17)               | sphere    | 2500       | -780 | 20-45 | 100        | no fit        | no fit | no fit      |              |
| 1 (ID 17)               | sphere    | 2500       | -780 | 35    | 110        | <b>1765.9</b> | 198.6  | <b>20.7</b> |              |
|                         |           |            |      | 55    | 110        | <b>1483</b>   | 402    | <b>24.8</b> |              |
| 2 (ID 17)               | sphere    | 2500       | -780 | 20-40 | 120        | no fit        | no fit | no fit      |              |
|                         |           |            |      | 45    |            | <b>1967</b>   | 361.4  | <b>23.9</b> |              |
|                         |           |            |      | 50    |            | <b>1872.6</b> | 423.8  | <b>25.1</b> |              |
|                         |           |            |      | 55    |            | <b>1740.6</b> | 484.2  | <b>26.1</b> |              |
| 1 (ID 17)               | sphere    | 2500       | -780 | 35    | 120        | <b>1991.5</b> | 235    | <b>21.5</b> |              |
|                         |           |            |      | 55    |            | <b>1691</b>   | 476.5  | <b>26</b>   |              |

|        |              |        |             |      |       |            |               |        |        |            |
|--------|--------------|--------|-------------|------|-------|------------|---------------|--------|--------|------------|
| AUG 28 | 1-2 (ID 17)  | sphere | 2500        | -780 | 20-45 | 130        | no fit        | no fit | no fit |            |
|        | 0.82 (MEG17) | sphere | 2500        | 70   | 75    | <b>100</b> | <b>468.3</b>  | 462    | 18.6   |            |
|        |              |        | 2500        |      | 45    | <b>80</b>  | <b>555.7</b>  | 160.6  | 10     |            |
|        | 0.23 (MEG16) | sphere | 2500        | -46  | 45    | 100        | no fit        | no fit | no fit |            |
|        |              |        | <b>2500</b> |      | 45    | <b>90</b>  | <b>713.3</b>  | 196.9  | 11.9   | <b>123</b> |
|        | 0.1 (MEG15)  | sphere | 1500        | -273 | 45-50 | 140-150    | no fit        | no fit | no fit |            |
|        |              |        | <b>1500</b> |      | 45    | <b>130</b> | <b>1023.5</b> | 335.8  | 22.4   | <b>147</b> |
|        |              | 1500   |             | 45   | 120   | no fit     | no fit        | no fit |        |            |

\*(Ugas= Uejecta + [V(4gpejecta/3CDpgas)] vD
